# Supplementary material
Source: publisher figshare collection journal article supplement (https://acs.figshare.com/ndownloader/files/21359682)
Supplement: Supplementary file 1 [file 21359682]

## Supporting Information

### Unexpected Roles of Triethanolamine in the Photochemical Reduction of CO<sub>2</sub> to Formate by Ruthenium Complexes

Renato N. Sampaio,<sup>†,\*</sup> David C. Grills,<sup>†</sup> Dmitry E. Polyansky,<sup>†</sup> David J. Szalda,<sup>§</sup> Etsuko Fujita<sup>†,\*</sup>

<sup>†</sup>Chemistry Division, Brookhaven National Laboratory, Upton, NY 11973-5000, USA

<sup>§</sup>Department of Natural Science, Baruch College, CUNY, New York, NY 10010, USA

#### *Table of Contents*

|                                                                                                                                                                           |    |
|---------------------------------------------------------------------------------------------------------------------------------------------------------------------------|----|
| 1. Supplementary UV-vis/ spectra of Ru(CO)(CO) <sup>2+</sup> monitoring its reactivity with TEOA and Hydroxide .....                                                      | 2  |
| 2. Supplementary IR spectra of Ru(CO)(CH <sub>3</sub> CN) <sup>2+</sup> monitoring its reactivity with TEOA.....                                                          | 3  |
| 3. Supplementary crystallographic data for Ru(CO)(CH <sub>3</sub> CN) <sup>2+</sup> and Ru(CO)(CH <sub>3</sub> CN-TEOA) <sup>2+</sup> .....                               | 4  |
| 4. Determination of equilibrium constant for the Zwitterionic capture of CO <sub>2</sub> . ....                                                                           | 7  |
| 5. Supplementary cyclic voltammograms of Ru(CO)(CH <sub>3</sub> CN) <sup>2+</sup> and Ru(CO)(HCOO) <sup>+</sup> .....                                                     | 9  |
| 6. Na-Hg Reduction .....                                                                                                                                                  | 11 |
| 7. Supplementary charge recombination kinetics from the singly-reduced Ru(CO)(X) <sup>(n-1)+</sup> complexes to BIH <sup>+</sup> , in the absence of TEOA. ....           | 13 |
| 8. Supplementary TRIR data for Ru(CO)(CO-TEOA) <sup>+</sup> , Ru(CO)(HCOO) <sup>+</sup> and Ru(CO)(H) <sup>+</sup> ..                                                     | 16 |
| 9. Hydricity determination and thermodynamic relationships used for the calculation of hydricity and pK <sub>a</sub> of the metal hydrides in acetonitrile solutions..... | 19 |
| 10. Thermodynamic relationships for the determination of the pK <sub>a</sub> of BIH <sup>+</sup> . ....                                                                   | 26 |
| 11. Supplementary DFT data.....                                                                                                                                           | 27 |

1. Supplementary UV-vis/ spectra of  $\text{Ru}(\text{CO})(\text{CO})^{2+}$  monitoring its reactivity with TEOA and Hydroxide

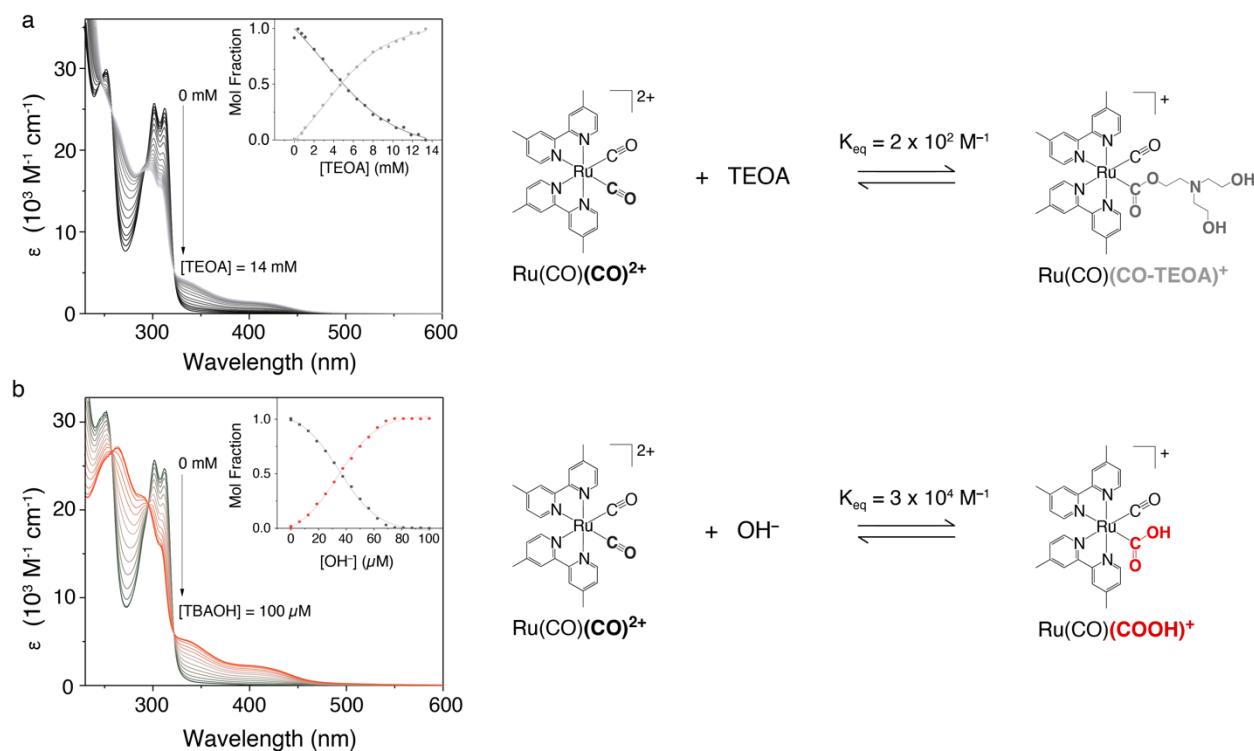

Figure S1. UV-vis spectral changes of  $\text{Ru}(\text{CO})(\text{CO})^{2+}$  in acetonitrile solution upon titration of known concentrations of a) triethanolamine (TEOA) and b) TBAOH. Equilibrium constants were determined at the concentration of the respective added Lewis base when equal amounts of  $\text{Ru}(\text{CO})(\text{CO})^{2+}$  and  $\text{Ru}(\text{CO})(\text{CO-TEOA})^+$ , or  $\text{Ru}(\text{CO})(\text{COOH})^+$ , existed. Note that in the case of the TEOA reaction, it is the deprotonated form of TEOA that binds to the complex.

2. Supplementary IR spectra of  $\text{Ru}(\text{CO})(\text{CH}_3\text{CN})^{2+}$  monitoring its reactivity with TEOA

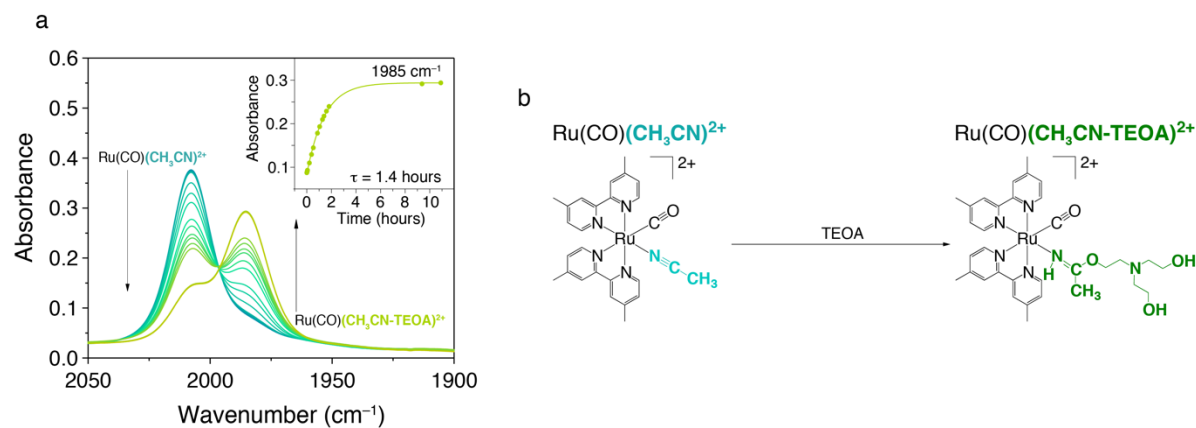

Figure S2. a) Mid-infrared absorption changes of the  $\nu(\text{CO})$  vibration of  $\text{Ru}(\text{CO})(\text{CH}_3\text{CN})^{2+}$  monitored in 1.4 M TEOA/ $\text{CH}_3\text{CN}$  solution. b) Scheme depicting the reactivity of TEOA towards the  $\text{Ru}(\text{CO})(\text{CH}_3\text{CN})^{2+}$  complex.

### 3. Supplementary crystallographic data for $Ru(CO)(CH_3CN)^{2+}$ and $Ru(CO)(CH_3CN-TEOA)^{2+}$

**Determination and Refinement of the Structure.** The structures were solved by using direct methods. In the least-squares refinement, anisotropic temperature parameters were used for all the non-hydrogen atoms except for the disordered acetone molecule in  $[Ru(dmb)_2(CO)(CH_3CN)](PF_6)_2$  with occupancy factor of 0.3. The hydrogen atoms on the acetone molecule were not included in the final refinement. Hydrogen atoms were placed at calculated positions and allowed to "ride" on the atom to which they were attached except for the hydrogen atoms on the oxygen atoms of triethanolamine which were located on a difference Fourier map and included with fixed positional parameters. The isotropic thermal parameters for the hydrogen atoms were determined from the atom to which they are attached. The data were corrected for absorption using the multi-scan method (SADABS).

$Ru(dmb)_2(CO)(CH_3CN)](PF_6)_2$  consists of a Ru(II) center coordinated to two 4,4'-dimethyl-2,2'-bipyridyl ligands cis to one another and a carbonyl ligand with the acetonitrile ligand occupying the sixth coordination position. In  $[Ru(dmb)_2(CO)\{NHC(CH_3)-OC_2H_4\}N(C_2H_4OH)_2](PF_6)_2$  the sixth coordination site is occupied by the  $NHC(CH_3)-OC_2H_4\}N(C_2H_4OH)_2$  ligand. Details of the crystallographic data collection and the refinement of the structures are presented in Table S1. Table S2 contains the bond lengths and angles in the coordination sphere for the two structures. The bond length between the Ru-atom and the nitrogen atom of the sixth ligand is slightly longer (0.028(4)Å) for the  $NHC(CH_3)-OC_2H_4\}N(C_2H_4OH)_2$  ligand.

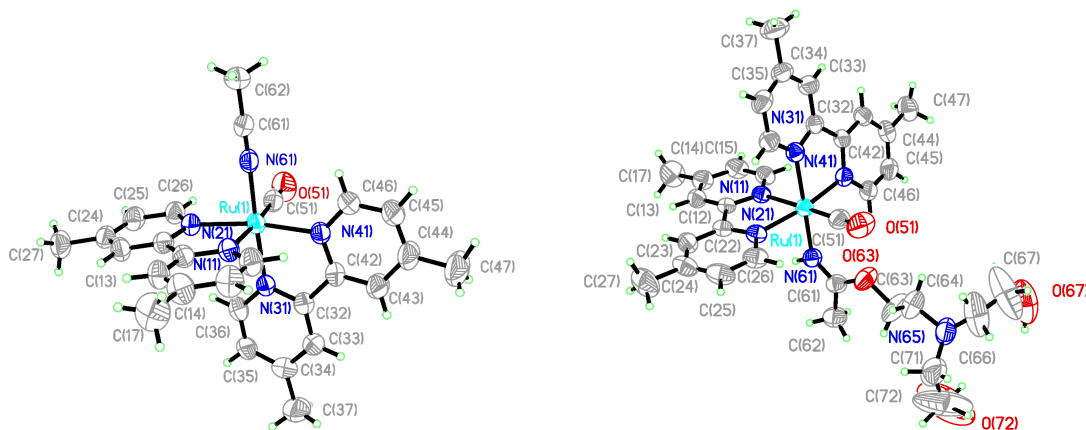

ORTEP drawings of  $Ru(dmb)_2(CO)(CH_3CN)]^{2+}$  (left) and  $[Ru(dmb)_2(CO)\{NHC(CH_3)-OC_2H_4\}N(C_2H_4OH)_2]^{2+}$  (right) cations.

The dihedral angle between the two dmb ligands is smaller in  $[\text{Ru}(\text{dmb})_2(\text{CO})\{\text{NHC}(\text{CH}_3)\text{-OC}_2\text{H}_4\}\text{N}(\text{C}_2\text{H}_4\text{OH})_2](\text{PF}_6)_2$  due to the larger size of the sixth ligand. Details of the hydrogen bonding in  $[\text{Ru}(\text{dmb})_2(\text{CO})\{\text{NHC}(\text{CH}_3)\text{-OC}_2\text{H}_4\}\text{N}(\text{C}_2\text{H}_4\text{OH})_2](\text{PF}_6)_2$  are shown in Table S3. The -OH groups at the end of the  $\{\text{NHC}(\text{CH}_3)\text{-OC}_2\text{H}_4\}\text{N}(\text{C}_2\text{H}_4\text{OH})_2$  ligand form hydrogen bonds with the -OH groups on a symmetry-related molecule. The ligand is somewhat disordered as it stretches away from the coordinated nitrogen because of the long flexible chain which contains both the donor groups and the accepting groups for the hydrogen bonds.

Table S1. Crystallographic Collection and Refinement Data for  $[\text{Ru}(\text{dmb})_2(\text{CO})(\text{CH}_3\text{CN})](\text{PF}_6)_2$  and  $[\text{Ru}(\text{dmb})_2(\text{CO})\{\text{NHC}(\text{CH}_3)\text{-OC}_2\text{H}_4\}\text{N}(\text{C}_2\text{H}_4\text{OH})_2](\text{PF}_6)_2$

|                                                  | $[\text{Ru}(\text{dmb})_2(\text{CO})(\text{CH}_3\text{CN})](\text{PF}_6)_2$      | $[\text{Ru}(\text{dmb})_2(\text{CO})\{\text{NHC}(\text{CH}_3)\text{-OC}_2\text{H}_4\}\text{N}(\text{C}_2\text{H}_4\text{OH})_2](\text{PF}_6)_2$ |
|--------------------------------------------------|----------------------------------------------------------------------------------|-------------------------------------------------------------------------------------------------------------------------------------------------|
| Formula                                          | $\text{C}_{33}\text{H}_{39}\text{O}_3\text{N}_5\text{P}_2\text{F}_{12}\text{Ru}$ | $\text{C}_{36}\text{H}_{48}\text{O}_5\text{N}_6\text{P}_2\text{F}_{12}\text{Ru}$                                                                |
| fw                                               | 944.70                                                                           | 1035.81                                                                                                                                         |
| temp                                             | 296(2) K                                                                         | 296(2) K                                                                                                                                        |
| cryst. syst.                                     | Triclinic                                                                        | Triclinic                                                                                                                                       |
| space group                                      | $P\bar{1}$                                                                       | $P\bar{1}$                                                                                                                                      |
| $a$ (Å)                                          | 10.1169(7)                                                                       | 10.2665(4)                                                                                                                                      |
| $b$ (Å)                                          | 10.8235(7)                                                                       | 15.0186(5)                                                                                                                                      |
| $c$ (Å)                                          | 19.7200(13)                                                                      | 15.1586(6)                                                                                                                                      |
| $\alpha$ (deg)                                   | 96.808(4)                                                                        | 106.802(2)                                                                                                                                      |
| $\beta$ (deg)                                    | 98.601(4)                                                                        | 98.455(2)                                                                                                                                       |
| $\gamma$ (deg)                                   | 101.702(3)                                                                       | 94.384(2)                                                                                                                                       |
| $V$ (Å <sup>3</sup> )                            | 2065.8(2)                                                                        | 2195.65(14)                                                                                                                                     |
| $Z$                                              | 2                                                                                | 2                                                                                                                                               |
| $\mu$                                            | 0.550 mm <sup>-1</sup>                                                           | 0.529 mm <sup>-1</sup>                                                                                                                          |
| $\lambda$ (Å)                                    | 0.71073                                                                          | 0.71073                                                                                                                                         |
| $\rho$ calc (g cm <sup>-3</sup> )                | 1.519                                                                            | 1.567                                                                                                                                           |
| cryst. size (mm)                                 | $0.43 \times 0.33 \times 0.10$                                                   | $0.43 \times 0.33 \times 0.10$                                                                                                                  |
| $\theta$ range (deg)                             | 2.07 to 26.00                                                                    | 1.68 to 27.50                                                                                                                                   |
| total no. of reflns                              | 50180                                                                            | 82354                                                                                                                                           |
| no. of independent reflns, $I \geq 3.0\sigma(I)$ | 7965 [R(int) = 0.1121] 5334                                                      | 9998 [R(int) = 0.0828] 6288                                                                                                                     |
| no. of parameters                                | 512                                                                              | 649                                                                                                                                             |
| Final R indices [ $I \geq 3.0\sigma(I)$ ]        | R1 = 0.0550, wR2 = 0.1439                                                        | R1 = 0.0498, wR2 = 0.1105                                                                                                                       |
| R indices (all data)                             | R1 = 0.0990, wR2 = 0.0828                                                        | R1 = 0.1058, wR2 = 0.1253                                                                                                                       |
| Goodness-of-fit on F2                            | 0.981                                                                            | 0.998                                                                                                                                           |
| Absorption correction                            | Semi-empirical from equivalents                                                  | Semi-empirical from equivalents                                                                                                                 |

$$R1 = \sum ||F_o| - |F_c|| / \sum |F_o| \quad ; \quad wR2 = \{\sum [w(|F_o|^2 - |F_c|^2)^2] / \sum [w|F_o|^2]\}^{1/2}$$

Table S2. Comparison of select bond lengths (Å) and angles (°) in the coordination sphere of [Ru(dmb)<sub>2</sub>(CO)(NCCH<sub>3</sub>)](PF<sub>6</sub>)<sub>2</sub> and [Ru(dmb)<sub>2</sub>(CO){NHC(CH<sub>3</sub>)-OC<sub>2</sub>H<sub>4</sub>}N(C<sub>2</sub>H<sub>4</sub>OH)<sub>2</sub>](PF<sub>6</sub>)<sub>2</sub>.

| X =               | NCCH <sub>3</sub> | {N(H)C(CH <sub>3</sub> )-OC <sub>2</sub> H <sub>4</sub> }N(C <sub>2</sub> H <sub>4</sub> OH) <sub>2</sub> |
|-------------------|-------------------|-----------------------------------------------------------------------------------------------------------|
| Ru(1)-N(11)       | 2.101(4)          | 2.130(2)                                                                                                  |
| Ru(1)-N(21)       | 2.071(4)          | 2.068(3)                                                                                                  |
| Ru(1)-N(31)       | 2.052(3)          | 2.068(3)                                                                                                  |
| Ru(1)-N(41)       | 2.066(4)          | 2.063(3)                                                                                                  |
| Ru(1)-C(51)       | 1.849(5)          | 1.839(4)                                                                                                  |
| Ru(1)-X           | 2.048(4)          | 2.076(3)                                                                                                  |
| N(21)-Ru(1)-N(11) | 77.85(14)         | 77.47(10)                                                                                                 |
| N(31)-Ru(1)-N(11) | 87.32(13)         | 85.32(10)                                                                                                 |
| N(41)-Ru(1)-N(11) | 93.99(14)         | 93.33(10)                                                                                                 |
| C(51)-Ru(1)-N(11) | 174.92(17)        | 172.85(14)                                                                                                |
| X-Ru(1)-N(11)     | 89.04(14)         | 88.35(10)                                                                                                 |
| N(31)-Ru(1)-N(21) | 93.86(14)         | 97.19(11)                                                                                                 |
| N(41)-Ru(1)-N(21) | 169.56(14)        | 170.19(10)                                                                                                |
| C(51)-Ru(1)-N(21) | 97.15(17)         | 96.59(14)                                                                                                 |
| X-Ru(1)-N(21)     | 89.56(14)         | 86.31(11)                                                                                                 |
| N(41)-Ru(1)-N(31) | 79.11(14)         | 78.46(11)                                                                                                 |
| C(51)-Ru(1)-N(31) | 93.95(17)         | 91.56(13)                                                                                                 |
| X-Ru(1)-N(31)     | 174.37(14)        | 171.92(10)                                                                                                |
| C(51)-Ru(1)-N(41) | 91.08(17)         | 92.34(14)                                                                                                 |
| X-Ru(1)-N(41)     | 96.88(14)         | 96.93(11)                                                                                                 |
| X-Ru(1)-N(51)     | 90.06(18)         | 95.29(13)                                                                                                 |
| dmb-dmb           | 82.09(8)          | 76.29(5)                                                                                                  |

Table S3. Hydrogen bonds H...A (Å) and angles (deg) in [Ru(dmb)<sub>2</sub>(CO){NHC(CH<sub>3</sub>)-OC<sub>2</sub>H<sub>4</sub>}N(C<sub>2</sub>H<sub>4</sub>OH)<sub>2</sub>](PF<sub>6</sub>)<sub>2</sub>

| D-H     | d(D-H) | d(H...A) | <DHA   | d(D...A) | A                       |
|---------|--------|----------|--------|----------|-------------------------|
| N61-H61 | 0.860  | 2.171    | 173.97 | 3.028    | F11 [-x+2, -y+1, -z+1]  |
| N61-H61 | 0.860  | 2.429    | 151.61 | 3.211    | F122 [-x+2, -y+1, -z+1] |
| O67-H67 | 1.115  | 1.735    | 132.52 | 2.621    | O72 [-x+2, -y+3, -z+2]  |
| O72-H72 | 0.868  | 2.012    | 177.77 | 2.880    | O72 [-x+2, -y+3, -z+2]  |

#### 4. Determination of equilibrium constant for the Zwitterionic capture of CO<sub>2</sub>.

The equilibrium constant for the reaction described below was obtained via titration measurements of known amounts of CO<sub>2</sub> to a 0.7 M TEOA/CH<sub>3</sub>CN solution while monitoring the mid-infrared absorption region characteristic of the C=O vibrations.

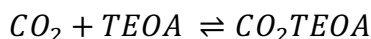

First, the molar absorption coefficient of free CO<sub>2</sub> was quantified in CH<sub>3</sub>CN, Figure S3. Two syringe pumps with gas-tight syringes – one containing CO<sub>2</sub>-saturated CH<sub>3</sub>CN (0.28 M) and another with N<sub>2</sub>-saturated CH<sub>3</sub>CN – were used for the controllable mixing into an IR flow cell. The antisymmetric vibration of CO<sub>2</sub>, 2342 cm<sup>-1</sup>, was monitored as a function of the titrated amount of CO<sub>2</sub>, from which the molar absorption coefficient was calculated ( $\epsilon = 2039 \text{ M}^{-1} \text{ cm}^{-1}$ ). At CO<sub>2</sub> concentrations > 20 mM, the IR absorption at 2342 cm<sup>-1</sup> diverged from the predicted linear behavior of the Beer-Lambert law, and the IR absorption at 2330 cm<sup>-1</sup> was used instead ( $\epsilon = 345 \text{ M}^{-1} \text{ cm}^{-1}$ ).

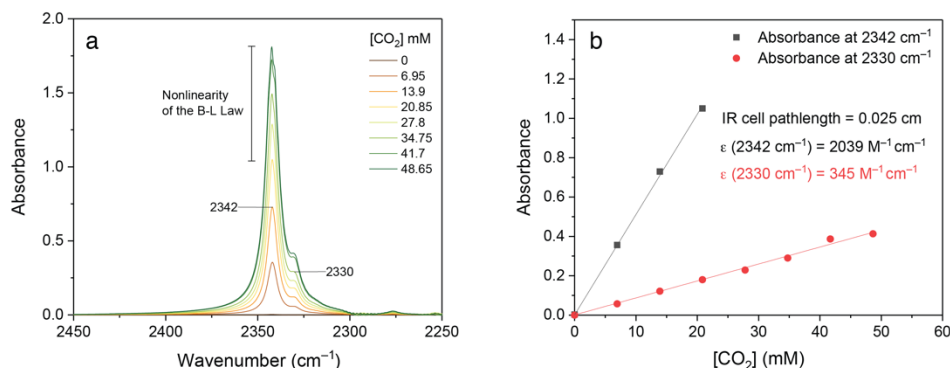

Figure S3. a) Mid-infrared absorption reporting on the  $\nu(\text{CO})$  vibration of CO<sub>2</sub>, at the indicated concentrations in CH<sub>3</sub>CN. b) Plot of the concentration dependence of the absorbance, from which molar absorption coefficients at the indicated wavenumbers were obtained using the Beer-Lambert relationship. The spectral resolution of the FTIR spectrometer was set to 2 cm<sup>-1</sup> for these measurements.

Knowing the molar absorption coefficient of CO<sub>2</sub> in CH<sub>3</sub>CN allowed for quantification of its concentration via FTIR absorption measurements. The zwitterionic capture of CO<sub>2</sub> was monitored by using three syringe pumps containing: i) N<sub>2</sub>-saturated 1.4 M TEOA/CH<sub>3</sub>CN, ii) N<sub>2</sub>-saturated CH<sub>3</sub>CN, and iii) CO<sub>2</sub>-saturated CH<sub>3</sub>CN solutions in gas-tight syringes. This configuration allowed for the titration of known amounts of free CO<sub>2</sub> into a 0.7 M TEOA/CH<sub>3</sub>CN solution. The known concentration of added CO<sub>2</sub> was compared to that determined by the IR absorption at 2342 cm<sup>-1</sup>

(or  $2330\text{ cm}^{-1}$ ) and the difference between them was assumed to be captured by TEOA to form the  $\text{CO}_2$ -TEOA zwitterion. Figure S4a compares the  $\text{CO}_2$ -TEOA concentration with the free  $\text{CO}_2$  in solution, from which the slope provided a measure of the equilibrium constant,  $K_{\text{eq}} = 0.07\text{ M}^{-1}$ , according to,

$$K_{\text{eq}} = \frac{[\text{CO}_2 - \text{TEOA}]}{[\text{CO}_2^f][\text{TEOA}]} \quad ; \quad [\text{CO}_2 - \text{TEOA}] = K_{\text{eq}}[\text{TEOA}][\text{CO}_2^f]$$

where the superscript  $f$  in  $[\text{CO}_2^f]$  denotes the concentration of unreacted – or *free* –  $\text{CO}_2$  that exists in the equilibrated mixture. The assumption that  $[\text{TEOA}] \gg [\text{CO}_2\text{-TEOA}]$  was considered here.

The absorbance of the new IR band at  $1646\text{ cm}^{-1}$  was plotted against the determined  $\text{CO}_2$ -TEOA concentration to obtain the molar absorption coefficient of the carbonyl asymmetric stretching band of the  $\text{CO}_2$ -TEOA zwitterion, Figure S4b ( $\epsilon = 333\text{ M}^{-1}\text{ cm}^{-1}$ ).

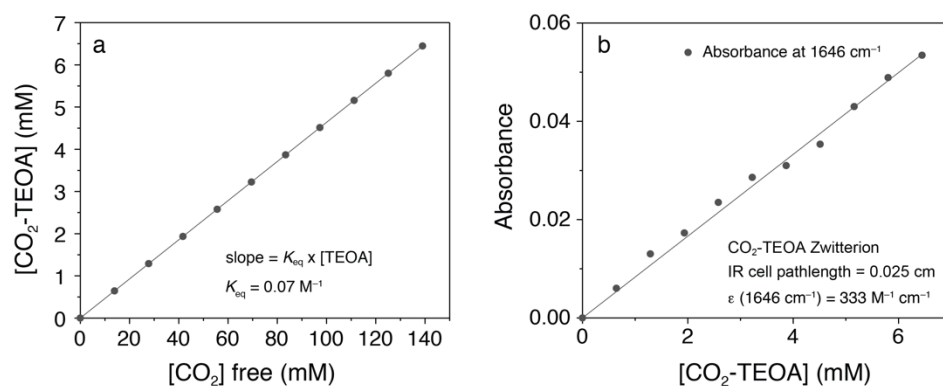

Figure S4. a) Plot of the calculated concentration of the zwitterionic  $\text{CO}_2$ -TEOA adduct as a function of the existing free  $\text{CO}_2$  in the equilibrium mixture, from which the slope of the linear dependency provided an estimate for the equilibrium constant described in Figure 2c. b) Beer-Lambert plot of the  $\text{CO}_2$ -TEOA absorption peak measured at  $1646\text{ cm}^{-1}$ . The spectral resolution of the FTIR spectrometer was set to  $2\text{ cm}^{-1}$  for these measurements.



5. Supplementary cyclic voltammograms of  $\text{Ru}(\text{CO})(\text{CH}_3\text{CN})^{2+}$  and  $\text{Ru}(\text{CO})(\text{HCOO})^+$ .

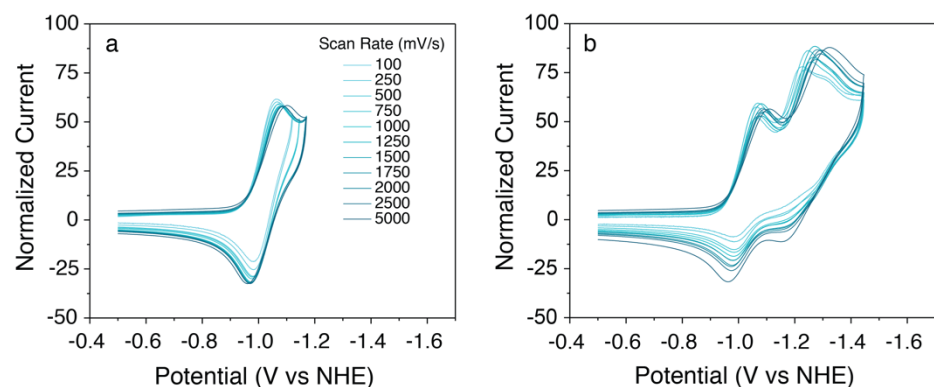

Figure S5. Cyclic voltammograms for a 1 mM solution of the  $\text{Ru}(\text{CO})(\text{CH}_3\text{CN})^{2+}$  complex measured at the indicated scan rates, in 0.1 M TBAPF<sub>6</sub> anhydrous  $\text{CH}_3\text{CN}$ . Potentials were converted to NHE using  $E_{1/2}(\text{Fc}^{+/0}) = 0.63$  V vs NHE in  $\text{CH}_3\text{CN}$  as the scaling factor.<sup>1</sup>

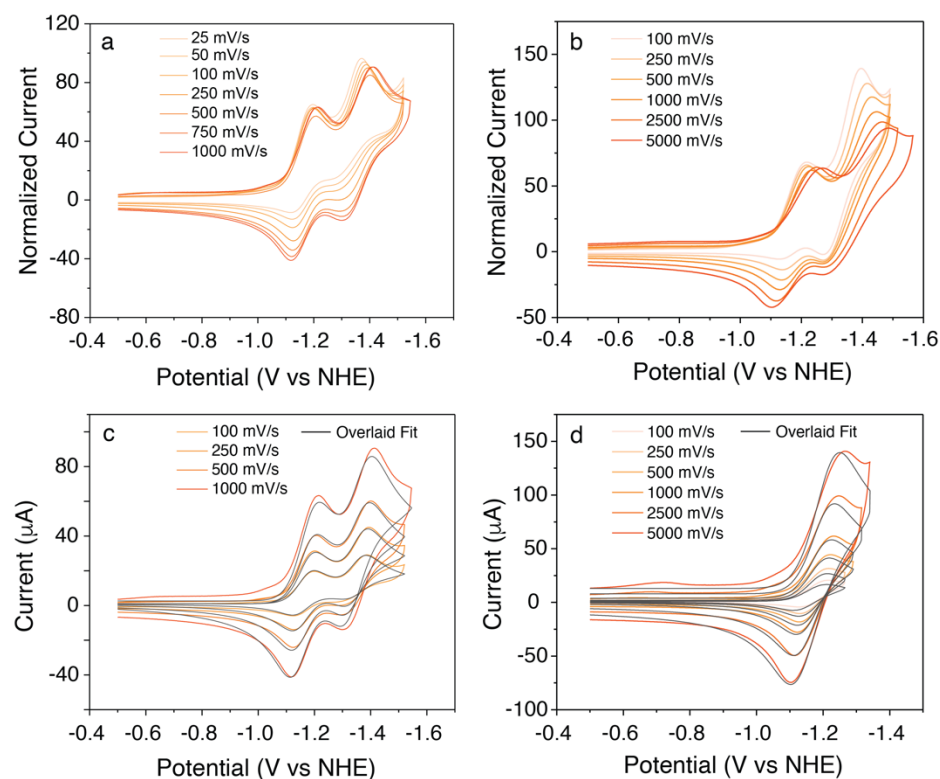

Figure S6. Cyclic voltammograms for a 1 mM solution of the  $\text{Ru}(\text{CO})(\text{HCOO})^+$  complex measured at the indicated scan rates, in a) 0.1 M TBAPF<sub>6</sub> anhydrous  $\text{CH}_3\text{CN}$  and b) with added 50 mM TEOA. Shown in panels c) and d) are overlaid fits (black traces) of  $\text{Ru}(\text{CO})(\text{HCOO})^+$  voltammogram data at the indicated scan rates in  $\text{CH}_3\text{CN}$  and 50 mM TEOA/ $\text{CH}_3\text{CN}$  respectively. Potentials were converted to NHE using  $E_{1/2}(\text{Fc}^{+/0}) = 0.63$  V vs NHE in  $\text{CH}_3\text{CN}$  as the scaling factor.<sup>1</sup>

The equations used in the DigiSim simulation software to model the electrochemical data are listed in Table S4.

Table S4. Equations used in the DigiSim simulations shown in Figures S6c and S6d.

|                                                                                                           |                                      | CH <sub>3</sub> CN | 50 mM TEOA/CH <sub>3</sub> CN |
|-----------------------------------------------------------------------------------------------------------|--------------------------------------|--------------------|-------------------------------|
| $\text{Ru}(\text{CO})(\text{HCOO})^+ + \text{e}^- \rightleftharpoons \text{Ru}(\text{CO})(\text{HCOO})^0$ | 1 <sup>st</sup> electrochemical step | ✓                  | ✓                             |
| $\text{Ru}(\text{CO})(\text{HCOO})^0 \rightleftharpoons \text{Ru}(\text{CO})^+ + \text{HCOO}^-$           | 1 <sup>st</sup> chemical step        | ✓                  | ✓                             |
| $\text{Ru}(\text{CO})(\text{HCOO})^0 + \text{e}^- \rightleftharpoons \text{Ru}(\text{CO})(\text{HCOO})^-$ | 3 <sup>rd</sup> electrochemical step | ✓                  |                               |
| $\text{Ru}(\text{CO})(\text{HCOO})^- \rightleftharpoons \text{Ru}(\text{CO})^0 + \text{HCOO}^-$           | 2 <sup>nd</sup> chemical step        | ✓                  |                               |

Table S5 lists the equilibrium and kinetic parameters for formate dissociation from the singly- and doubly-reduced  $\text{Ru}(\text{CO})(\text{HCOO})^+$  complex, obtained from the DigiSim simulations shown in Figures S6b and S6c. We should note that due to the large number of equations used in the simulations (Table S4), and thus the large number of fitting parameters, these values may be subject to large errors.

Table S5. Equilibrium and kinetic parameters for  $\text{HCOO}^-$  dissociation.<sup>a</sup>

| Reaction                                                                                        | Ru(CO)(HCOO) <sup>+</sup> Kinetic Parameters |                                   |                               |                                   |
|-------------------------------------------------------------------------------------------------|----------------------------------------------|-----------------------------------|-------------------------------|-----------------------------------|
|                                                                                                 | CH <sub>3</sub> CN                           |                                   | 50 mM TEOA/CH <sub>3</sub> CN |                                   |
|                                                                                                 | $K_{\text{eq}}$ (M)                          | $k_{\text{f}}$ (s <sup>-1</sup> ) | $K_{\text{eq}}$ (M)           | $k_{\text{f}}$ (s <sup>-1</sup> ) |
| $\text{Ru}(\text{CO})(\text{HCOO})^0 \rightleftharpoons \text{Ru}(\text{CO})^+ + \text{HCOO}^-$ | 0.03                                         | 0.07                              | 3.9                           | 1.0                               |
| $\text{Ru}(\text{CO})(\text{HCOO})^- \rightleftharpoons \text{Ru}(\text{CO})^0 + \text{HCOO}^-$ | 430                                          | 0.66                              |                               |                                   |

<sup>a</sup>Values were extracted from simulated scan-rate dependent cyclic voltammograms of the  $\text{Ru}(\text{CO})(\text{HCOO})^+$  catalyst shown in Figure S6.

## 6. *Na-Hg Reduction*

### Experimental Procedure for Na-Hg Reduction

Sodium amalgam (~0.5% Na in Hg) was prepared by dissolving sodium metal in mercury in a fume hood and storing under argon. Spectroscopic grade CH<sub>3</sub>CN was dried over CaH<sub>2</sub>, distilled, and degassed by carrying out freeze-thaw cycles using a high-vacuum line. After molecular sieves in a round bottom flask were activated at 300 °C overnight using a high-vacuum line, the purified CH<sub>3</sub>CN was vacuum-transferred into the glassware containing the activated molecular sieves.

Home-made glassware equipped with an optical cell (1 – 10 mm pathlength), a Na-Hg chamber separated by a glass frit and a metal valve (or high-vacuum stopcock) was used for Na-Hg reduction experiments. The typical amount of metal complex used was much less than 1 mg, and an excess of Na-Hg was used. The glassware was placed on a high-vacuum line (~ 10<sup>-6</sup> torr) and the CH<sub>3</sub>CN mentioned above (2 – 4 mL) was vacuum-distilled into it. The glassware was then sealed and removed from the vacuum line. Stepwise Na-Hg reduction of the complex was performed under vacuum by moving a small amount of the solution to the Na-Hg chamber for a short time, and then back into the other chamber, followed by a UV-vis spectral measurement. The reduction process was gradually continued in this manner, with each step of the reduction resulting from the net transfer of one electron to the metal complex being determined by a loss of isosbestic points in the UV-vis spectra. This method has previously been used by our group for various systems.<sup>2-7</sup>

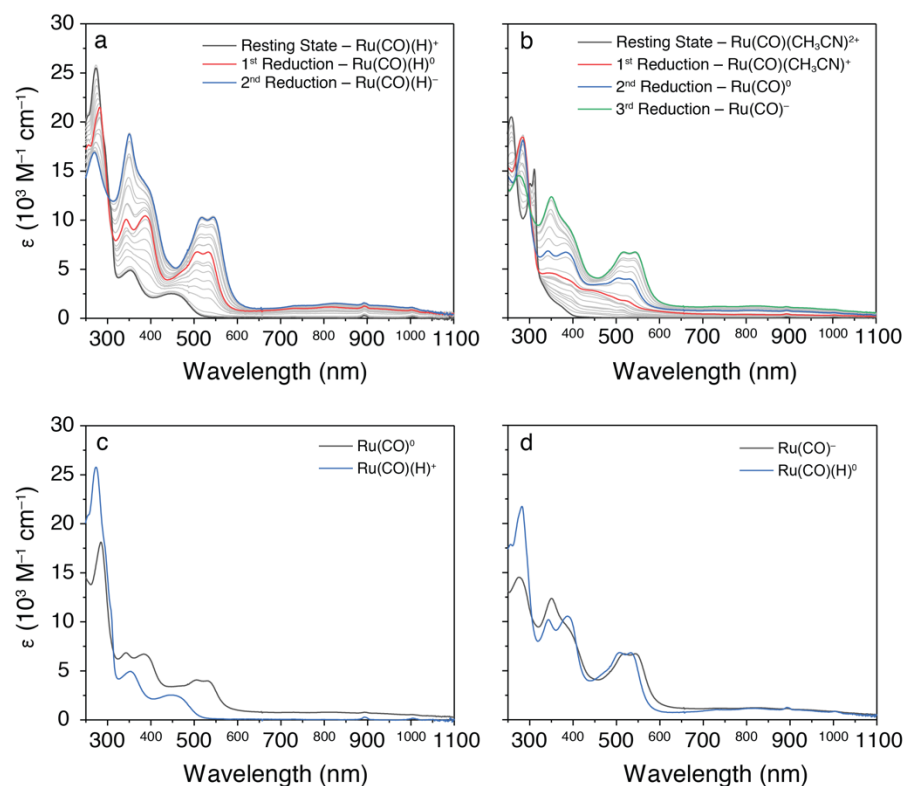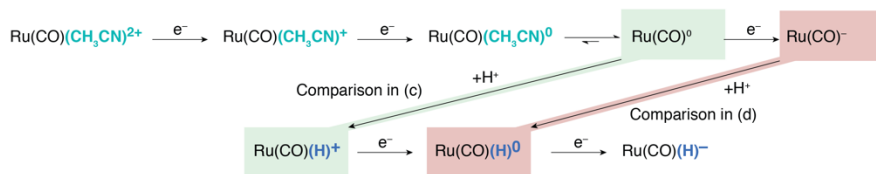

Figure S7. Sodium amalgam (Na-Hg) reduction of the (a)  $\text{Ru(CO)(H)}^+$  and (b)  $\text{Ru(CO)(CH}_3\text{CN)}^{2+}$  complexes in  $\text{CH}_3\text{CN}$ . c) Comparison of the UV-vis spectrum of  $\text{Ru(CO)(CH}_3\text{CN)}^{2+}$  after being reduced by two electrons with the spectrum for  $\text{Ru(CO)(H)}^+$ . d) Comparison of the UV-vis spectrum of  $\text{Ru(CO)(CH}_3\text{CN)}^{2+}$  after being reduced by three electrons with the spectrum for  $\text{Ru(CO)(H)}^0$ . The diagram at the bottom describes the expected redox states and chemical transformations for each complex. A list of the isosbestic points used to monitor each reduction step is provided below.

| Reduction Step                                                                       | Isosbestic Point (nm) |
|--------------------------------------------------------------------------------------|-----------------------|
| $\text{Ru(CO)(H)}^+ + e^- \rightarrow \text{Ru(CO)(H)}^0$                            | 312                   |
| $\text{Ru(CO)(H)}^0 + e^- \rightarrow \text{Ru(CO)(H)}^-$                            | 300                   |
| $\text{Ru(CO)(CH}_3\text{CN)}^{2+} + e^- \rightarrow \text{Ru(CO)(CH}_3\text{CN)}^+$ | 298 / 321             |
| $\text{Ru(CO)(CH}_3\text{CN)}^+ + e^- \rightarrow \text{Ru(CO)}^0$                   | 311                   |
| $\text{Ru(CO)}^0 + e^- \rightarrow \text{Ru(CO)}^-$                                  | 301                   |

7. Supplementary charge recombination kinetics from the singly-reduced  $\text{Ru}(\text{CO})(\text{X})^{(n-1)+}$  complexes to  $\text{BIH}^+$ , in the absence of TEOA.

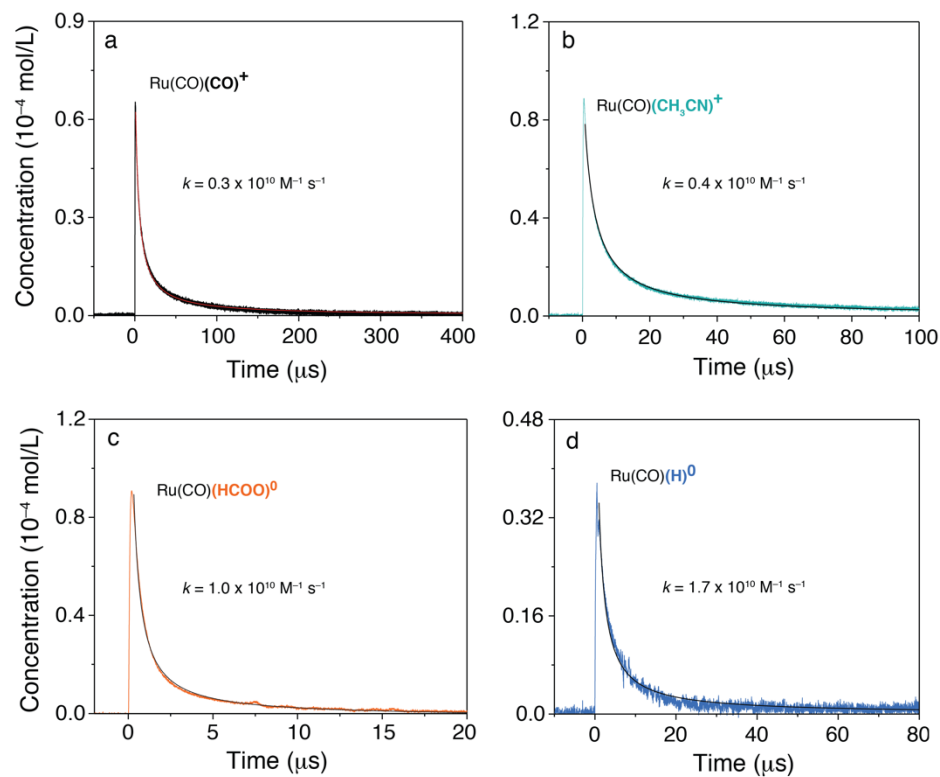

Figure S8. Time-dependent concentration traces of singly-reduced  $\text{Ru}(\text{CO})(\text{X})^{(n-1)+}$  complexes measured at their corresponding  $\nu(\text{CO})$  peak, in  $\text{N}_2$ -saturated  $\text{CH}_3\text{CN}$  solutions containing 5 mM  $\text{Ru}(\text{CO})(\text{X})^{n+}$ , 0.5 mM  $[\text{Ru}(\text{bpy-OMe})_3]^{2+}$  and 0.2 M BIH. Overlaid in black are fits to a second order equal concentration kinetic function.

The spectral changes corresponding to each kinetic trace in Figure S8 can be found in:

| Kinetic trace | Full transient spectra |
|---------------|------------------------|
| Figure S8a    | Figure 5a              |
| Figure S8b    | Figure S9a             |
| Figure S8c    | Figure 6a              |
| Figure S8d    | Figure 7a              |

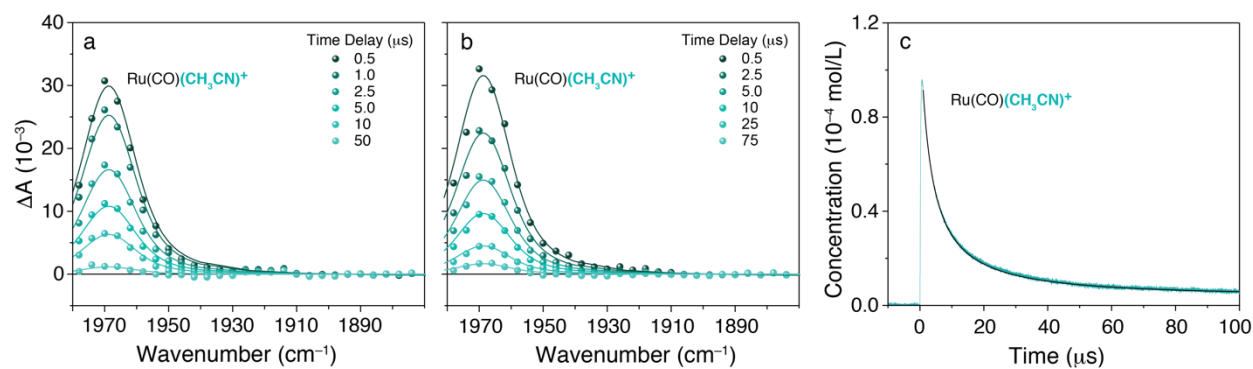

Figure S9. TRIR absorption changes of the  $\text{Ru(CO)(CH}_3\text{CN)}^{2+}$  complex measured at the indicated time delays after pulsed 532 nm excitation of the  $[\text{Ru(bpy-OMe)}_3]^{2+}$  chromophore: a) measured in neat  $\text{CH}_3\text{CN}$  solution and b) measured in 1.4 M TEOA/ $\text{CH}_3\text{CN}$  solution. Overlaid are spectral simulations based on a least squares fit of known  $\nu(\text{CO})$  IR spectra. c) Simulated time-dependent concentration profile of the transient species based on the least-squares fit global analysis. Note that data in the 2005 – 1980  $\text{cm}^{-1}$  range are not available due to the available tuning ranges of our infrared laser probes.

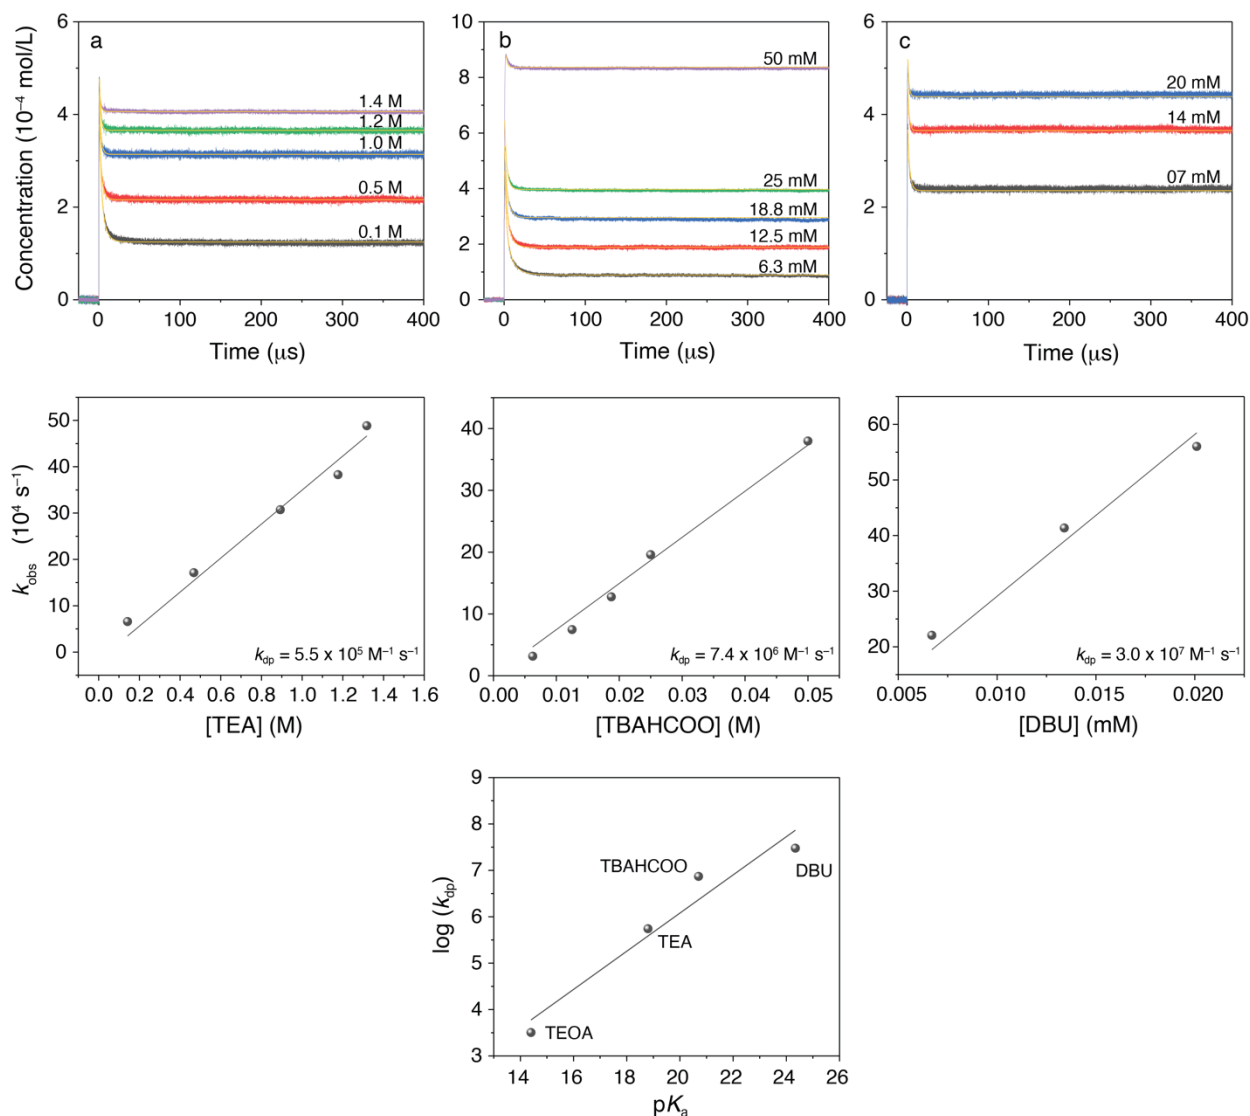

Figure S10. Kinetic traces measured at  $1894 \text{ cm}^{-1}$  that report on the concentration profile of the photochemically-generated, singly-reduced  $\text{Ru(CO)(H)}^0$  complex. Experiments were performed by varying the titrated amount of supporting base, a) TEA, b) TBAHCOO<sup>-</sup>, and c) DBU. Overlaid in yellow are fits to the numerical solution of equations 1 and 2 described in the main text. The graphs that follow in the bottom panel are representative of the observed rate constants for deprotonation of  $\text{BIH}^{++}$  as a function of the concentration of added base, from which the second-order rate constants were calculated. The graph shown at the bottom of Figure S10 relates the logarithm of the measured  $k_{\text{dp}}$  with the corresponding  $\text{p}K_{\text{a}}$  of the conjugate acid of the added Brønsted base.

8. Supplementary TRIR data for  $\text{Ru}(\text{CO})(\text{CO-TEOA})^+$ ,  $\text{Ru}(\text{CO})(\text{HCOO})^+$  and  $\text{Ru}(\text{CO})(\text{H})^+$ .

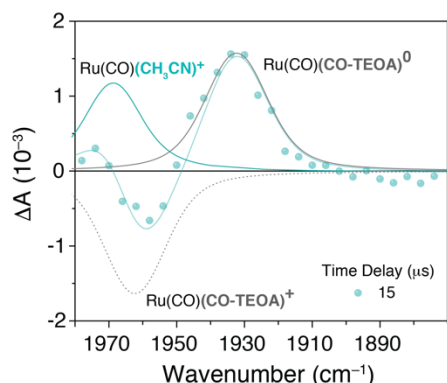

Figure S11. Representative least squares global fit analysis of the  $\text{Ru}(\text{CO})(\text{CO-TEOA})^+$  TRIR data taken at 15  $\mu\text{s}$  after pulsed 532 nm excitation of the  $[\text{Ru}(\text{bpy-OMe})_3]^{2+}$  chromophore in 1.4 M TEOA/ $\text{CH}_3\text{CN}$ ,  $\text{N}_2$ -saturated solution. The reference spectra of the *bleached*  $\text{Ru}(\text{CO})(\text{CO-TEOA})^+$ ,  $\text{Ru}(\text{CO})(\text{CO-TEOA})^0$  and  $\text{Ru}(\text{CO})(\text{CH}_3\text{CN})^+$  were included to satisfactorily model the transient data.

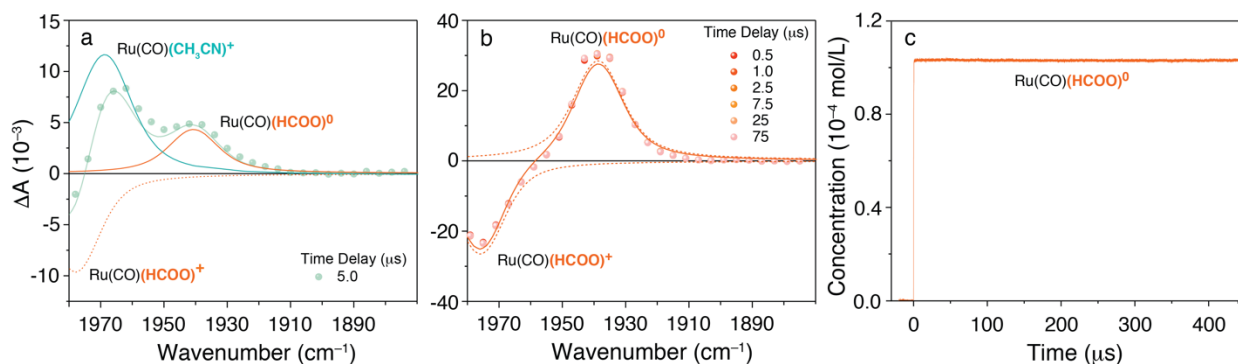

Figure S12. a) Representative least squares global fit analysis of the  $\text{Ru}(\text{CO})(\text{HCOO})^+$  TRIR data taken at 5  $\mu\text{s}$  after pulsed 532 nm excitation of the  $[\text{Ru}(\text{bpy-OMe})_3]^{2+}$  chromophore in 1.4 M TEOA/ $\text{CH}_3\text{CN}$ ,  $\text{N}_2$ -saturated solution. The reference spectra of the *bleached*  $\text{Ru}(\text{CO})(\text{HCOO})^+$ ,  $\text{Ru}(\text{CO})(\text{HCOO})^0$  and  $\text{Ru}(\text{CO})(\text{CH}_3\text{CN})^+$  were included to satisfactorily model the transient data. b) TRIR absorption changes of the  $\text{Ru}(\text{CO})(\text{HCOO})^+$  complex at the indicated time delays after pulsed 532 nm excitation of the  $[\text{Ru}(\text{bpy-OMe})_3]^{2+}$  chromophore in 50 mM TBAHCOO/ $\text{CH}_3\text{CN}$  solution. Overlaid are spectral simulations based on a least squares fit of the indicated known  $\nu(\text{CO})$  IR spectra. c) Simulated time-dependent concentration profile of the singly-reduced  $\text{Ru}(\text{CO})(\text{HCOO})^0$  based on the least-squares fit global analysis.



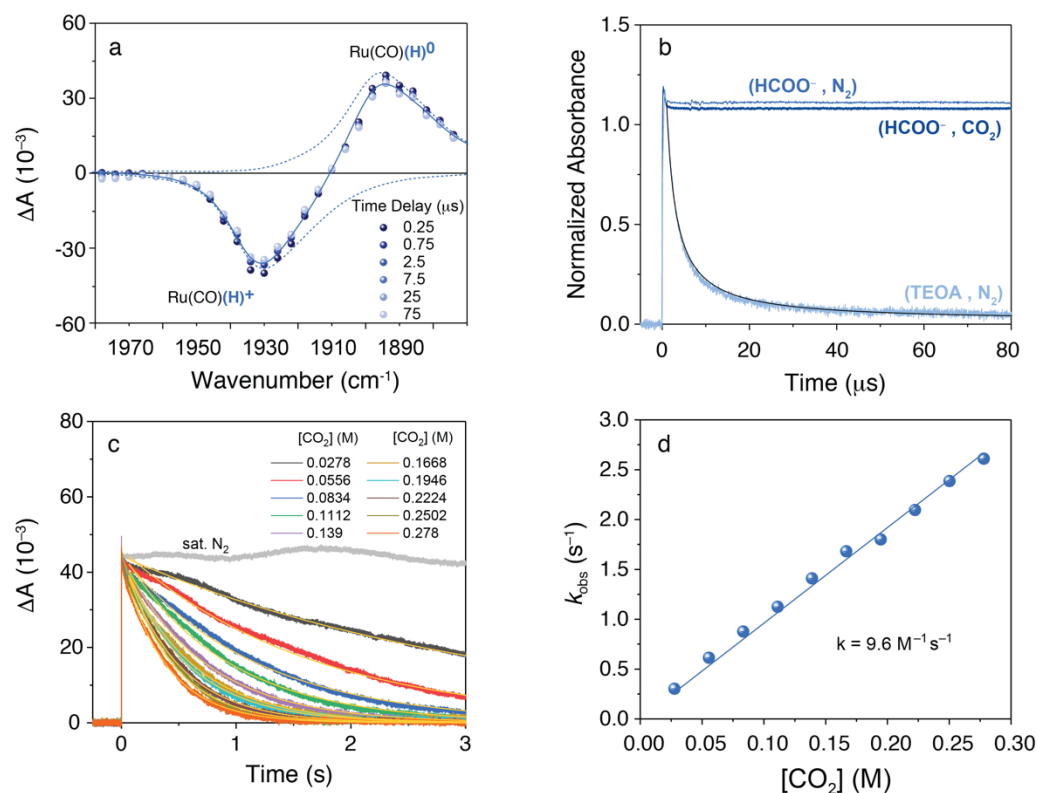

Figure S13. a) TRIR absorption changes of the Ru(CO)(H)<sup>+</sup> complex at the indicated time delays after pulsed 532 nm excitation of the [Ru(bpy-OMe)<sub>3</sub>]<sup>2+</sup> chromophore in 50 mM TBAHCOO/CH<sub>3</sub>CN, N<sub>2</sub>-saturated solution. Overlaid are spectral simulations based on a least squares fit of the data with the known IR spectra for Ru(CO)(H)<sup>+</sup> and Ru(CO)(H)<sup>0</sup>. b) Normalized kinetic traces at 1894  $\text{cm}^{-1}$ , measured in 50 mM TBAHCOO/CH<sub>3</sub>CN N<sub>2</sub>-saturated solution, 50 mM TBAHCOO/CH<sub>3</sub>CN CO<sub>2</sub>-saturated solution, or 1.4 M TEOA/CH<sub>3</sub>CN N<sub>2</sub>-saturated solution. c) Transient absorption changes indicative of the hydride transfer step to CO<sub>2</sub> measured at the Ru(CO)(H)<sup>0</sup> peak, 1894  $\text{cm}^{-1}$ , for the indicated concentrations of CO<sub>2</sub> in 50 mM TBAHCOO/CH<sub>3</sub>CN solutions. d) Plot of the observed rates of decay from panel c as a function of the CO<sub>2</sub> concentration, from which the second-order rate constant for hydride transfer to CO<sub>2</sub> was obtained.

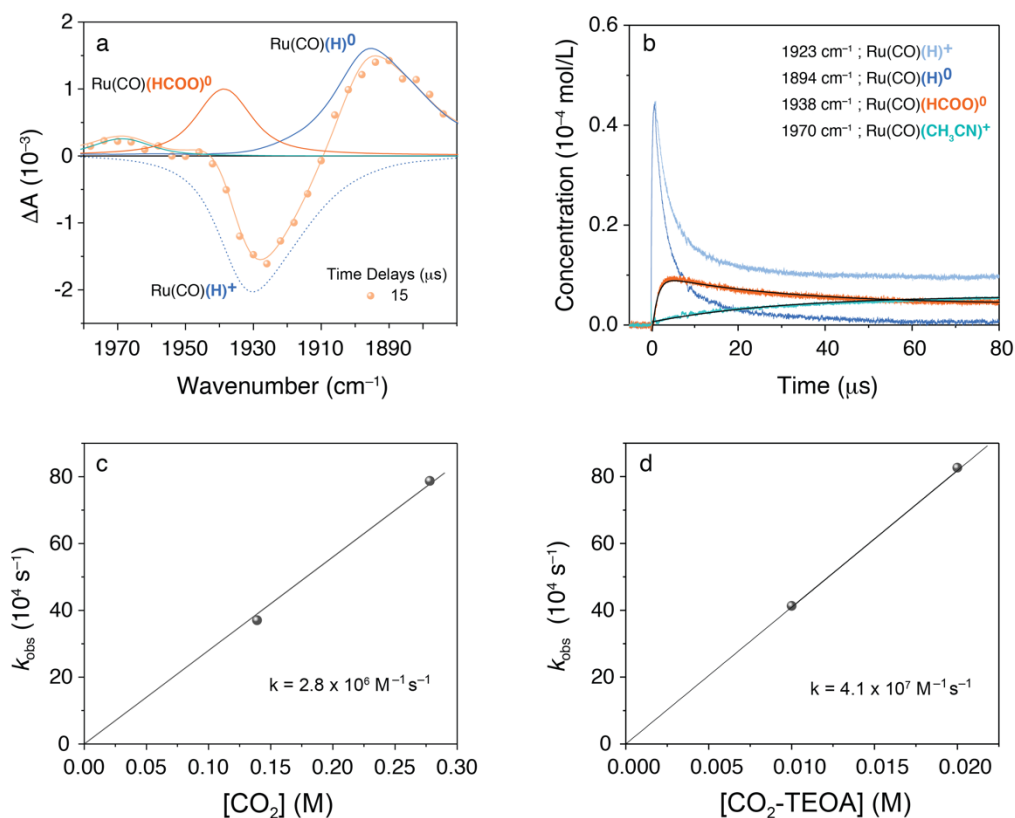

Figure S14. a) Representative least squares global fit analysis of the data in Figure 7b taken at 15  $\mu\text{s}$  after pulsed 532 nm excitation. The reference spectra of the *bleached*  $\text{Ru(CO)(H)}^+$ ,  $\text{Ru(CO)(H)}^0$ ,  $\text{Ru(CO)(HCOO)}^0$  and  $\text{Ru(CO)(CH}_3\text{CN)}^+$  were included to satisfactorily model the transient data. b) Single kinetic traces measured at wavenumbers that corresponded to absorption changes predominant of the indicated transient species (the data were converted to concentration profiles using the known molar absorption coefficients of each species and the cell pathlength); the raw kinetic trace representative of  $\text{Ru(CO)(HCOO)}^0$  at 1938  $\text{cm}^{-1}$  was subtracted by the contribution of *bleached*  $\text{Ru(CO)(H)}^+$ . Plots of the observed rates for the formation of  $\text{Ru(CO)(HCOO)}^0$  as a function of (c) the  $\text{CO}_2$  concentration, and (d) the  $\text{CO}_2\text{-TEOA}$  concentration, from which the second-order rate constants for hydride transfer to  $\text{CO}_2$  and  $\text{CO}_2\text{-TEOA}$ , were obtained, respectively.

9. *Hydricity determination and thermodynamic relationships used for the calculation of hydricity and  $pK_a$  of the metal hydrides in acetonitrile solutions.*

The hydricity value for  $[\text{Ru}(\text{dmb})_2(\text{CO})(\text{H})]^+$  was determined experimentally using the direct hydride transfer method relative to  $[\text{Ru}(\text{HMB})(\text{bpy})(\text{H})]^+$  ( $\Delta G_{\text{H}^-} = 54 \pm 2 \text{ kcal mol}^{-1}$ )<sup>8</sup> as the reference hydride, and relative to the hydricity of  $\text{H}_2$  by stoichiometric addition of protonated triethylamine,<sup>9</sup>  $\text{TEAH}^+$  ( $pK_a = 18.82$ )<sup>10-11</sup>, as the proton source.

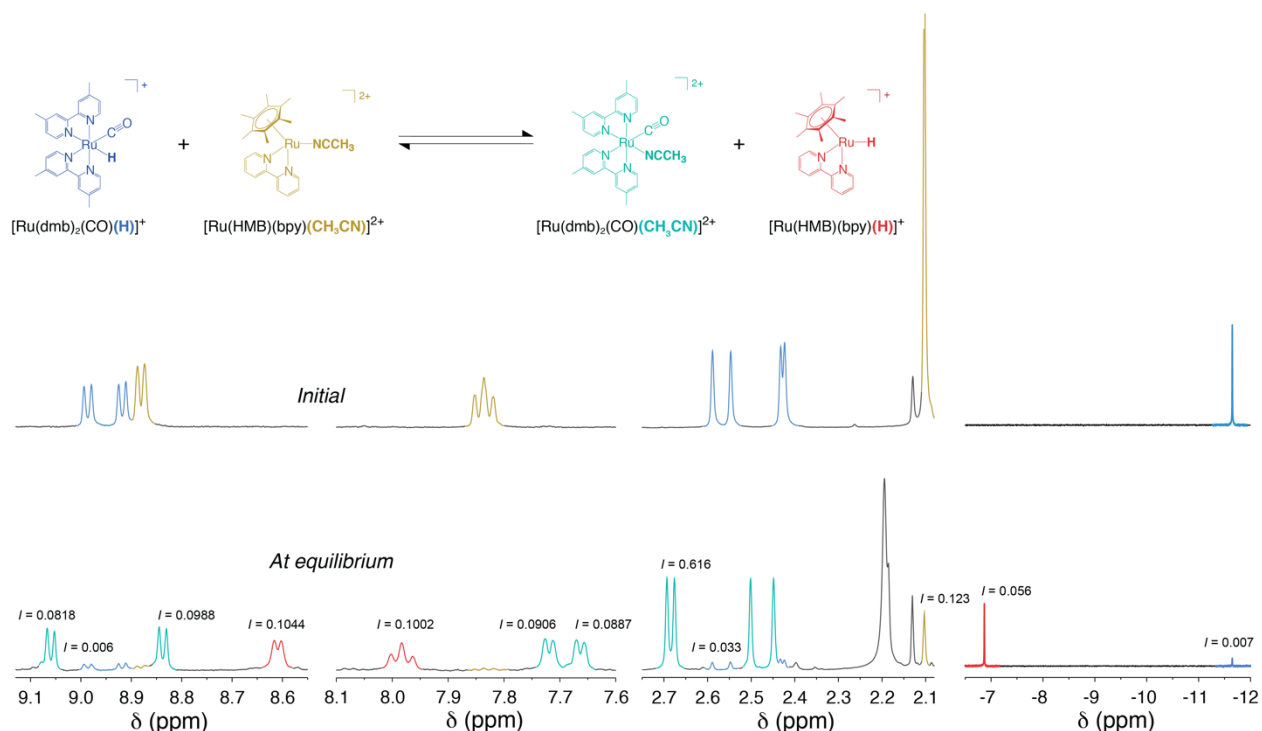

Figure S15.  $^1\text{H}$ -NMR spectra of the reaction equilibrium illustrated in the figure in  $\text{CD}_3\text{CN}$  solution. The metal hydrides,  $[\text{Ru}(\text{dmb})_2(\text{CO})(\text{H})]^+$  and  $[\text{Ru}(\text{HMB})(\text{bpy})(\text{CH}_3\text{CN})]^{2+}$  were mixed at near equimolar quantities for six independent experiments, from which the obtained equilibrium constants were used to calculate an average hydricity value.

Figure S15 shows the  $^1\text{H}$ -NMR spectra of the solution mixture ( $[\text{Ru}(\text{dmb})_2(\text{CO})(\text{H})]^+ : [\text{Ru}(\text{HMB})(\text{bpy})(\text{CH}_3\text{CN})]^{2+}$  in  $\text{CD}_3\text{CN}$ ) at near equimolar concentration before and after the reaction has achieved equilibrium. The solution mixture was heated to  $80^\circ \text{C}$  for multiple intervals of 10 minutes and the reaction equilibrium was monitored by  $^1\text{H}$ -NMR at  $25^\circ \text{C}$ . Equilibrium was established after 1 hour of accumulated heating. The indicated integral values were used to

quantify the equilibrium constants, from which a hydricity value for  $[\text{Ru}(\text{dmb})_2(\text{CO})(\text{H})]^+$  of  $\Delta G_{\text{H}^-} = 51 \pm 0.5 \text{ kcal mol}^{-1}$  was obtained relative to  $[\text{Ru}(\text{HMB})(\text{bpy})(\text{H})]^+$  ( $\Delta G_{\text{H}^-} = 54 \pm 2 \text{ kcal mol}^{-1}$ ) using equation S1. The obtained value was averaged over six independent experiments at similar conditions.

$$\Delta G_{\text{H}^-} = \Delta G_{\text{H}^-}(\text{ref.}) - 1.364 \log(K_{\text{eq}}) \quad \text{S1}$$

In a separate experiment,  $[\text{Ru}(\text{dmb})_2(\text{CO})(\text{H})]^+$  and  $\text{TEAH}^+$  were mixed in a 1:10 concentration ratio in  $\text{CD}_3\text{CN}$  and added to an air-free NMR tube. Equilibrium was monitored at multiple intervals of 10 minutes of heating at  $80^\circ \text{C}$ . Equilibrium was achieved after 1 hour. The hydricity of  $[\text{Ru}(\text{dmb})_2(\text{CO})(\text{H})]^+$  was determined by measuring the equilibrium constant for,

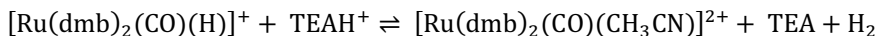

according to equation S2,

$$\Delta G_{\text{H}^-} = -1.364 \times \log(K_{\text{eq}}) - 1.364 \times \text{p}K_{\text{a}}(\text{TEAH}^+) + 77 \quad \text{S2}$$

Integration of the NMR data for  $[\text{Ru}(\text{dmb})_2(\text{CO})(\text{H})]^+$  and  $[\text{Ru}(\text{dmb})_2(\text{CO})(\text{CH}_3\text{CN})]^{2+}$  provided  $K_{\text{eq}} = 3.68 \text{ atm}$  (the amount of  $\text{TEAH}^+$  converted to TEA was assumed to be equal to the amount of  $[\text{Ru}(\text{dmb})_2(\text{CO})(\text{H})]^+$  that has been converted to  $[\text{Ru}(\text{dmb})_2(\text{CO})(\text{CH}_3\text{CN})]^{2+}$ ; similarly, the partial pressure of  $\text{H}_2$  was calculated by assuming that the amount of  $\text{H}_2$  produced was equal to  $[\text{Ru}(\text{dmb})_2(\text{CO})(\text{CH}_3\text{CN})]^{2+}$ ). The hydricity obtained by this method for  $[\text{Ru}(\text{dmb})_2(\text{CO})(\text{H})]^+$ ,  $\Delta G_{\text{H}^-} = 50.6 \text{ kcal mol}^{-1}$ , is in good agreement with the value determined using the direct hydride transfer method.

The final hydricity for  $[\text{Ru}(\text{dmb})_2(\text{CO})(\text{H})]^+$ ,  $\Delta G_{\text{H}^-} = 51 \pm 0.5 \text{ kcal mol}^{-1}$ , was obtained by averaging the values from the two experimental methods discussed above.

Complementary DFT calculations were also conducted to estimate the hydricity value of  $[\text{Ru}(\text{dmb})_2(\text{CO})(\text{H})]^+$  using an isodesmic relationship with  $[\text{Ru}(\text{tpy})(\text{bpy})(\text{H})]^+$  as the reference metal hydride ( $\Delta G_{\text{H}^-} = 39 \pm 3 \text{ kcal mol}^{-1}$ ).<sup>5, 12</sup> We note here that the original work from Creutz and co-authors experimentally determined the hydricity of  $[\text{Ru}(\text{tpy})(\text{bpy})(\text{H})]^+$  as  $\Delta G_{\text{H}^-} = 39 \pm 3 \text{ kcal mol}^{-1}$ ,<sup>5</sup> while a review article from Appel, Miller and co-authors on hydricity of metal hydrides mistakenly cited this value with too high a precision,<sup>8</sup>  $39.3 \text{ kcal mol}^{-1}$ . The reaction free energy change for a hydride transfer between  $\text{Ru}(\text{tpy})(\text{bpy})(\text{H})^+$  and  $\text{Ru}(\text{CO})(\text{CH}_3\text{CN})^{2+}$ ,

$\text{Ru}(\text{tpy})(\text{bpy})\text{H}^+ + \text{Ru}(\text{CO})(\text{CH}_3\text{CN})^{2+} \rightleftharpoons \text{Ru}(\text{tpy})(\text{bpy})(\text{CH}_3\text{CN})^{2+} + \text{Ru}(\text{CO})(\text{H})^+ \quad (\Delta G^\circ = -11.5 \text{ kcal/mol}^{-1})$  S3

was computationally determined by comparing the total free energies of each optimized structure. This value was then added to the hydricity of the reference compound,  $[\text{Ru}(\text{tpy})(\text{bpy})(\text{H})]^+$ . In using this approach, errors inherent to the computational methods are thought to be minimized since they are *cancelled out* by taking the difference in free energy. The computed free energy for the reaction equilibrium described in equation S3 was  $\Delta G^\circ = -11.5 \text{ kcal mol}^{-1}$  exergonic, and therefore provided a calculated hydricity for  $[\text{Ru}(\text{dmb})_2(\text{CO})(\text{H})]^+$  of  $\Delta G_{\text{H}^-} = 50.8 \text{ kcal mol}^{-1}$ .

For all other hydricity values – *at different redox states of the metal hydride* – as well as the acidity ( $\Delta G_{\text{H}^+} = 1.364 \times \text{p}K_{\text{a}}$ ) and the homolytic M–H bond cleavage ( $\Delta G_{\text{H}^\bullet}$ ), thermochemical cycles were used by relating these quantities to reduction potentials ( $E_{1/2}$ ) through free energy relationships.<sup>8</sup> The diagram below exemplifies this combination of free energies for a cationic metal hydride  $[\text{M}–\text{H}]^+$  – in its resting state – and its hypothetically accessible redox states, with those of the parent complex which considers a solvent molecule coordinated to the metal. Note that the diagram below omits the signs (*positive* or *negative*) that accompany each thermodynamic quantity for a specific reaction path.

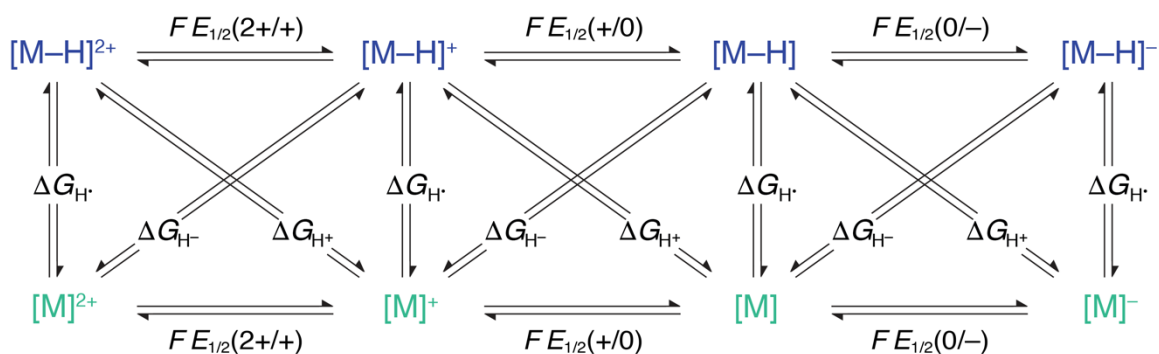

In addition to the free energy parameters depicted above, the thermodynamic constants that connect  $\text{H}^\bullet$ ,  $\text{H}^+$ ,  $\text{H}^-$  and  $\text{H}_2$  must be adequately included to complete specific thermodynamic cycles.<sup>8</sup> For a complete list of these physical quantities, the authors recommend the review article in reference [2]. For this discussion, only the thermodynamic free energy required for the reactions listed below will be considered relevant.

$$\text{H}_{(\text{solv})}^+ + \text{e}^- \rightleftharpoons \text{H}_{(\text{solv})}^\bullet \quad \Delta G_{\text{H}^+/\text{H}^\bullet}^o = 53.6 \text{ kcal mol}^{-1} \quad \text{S4.1}$$

$$\text{H}_{(\text{solv})}^\bullet + \text{e}^- \rightleftharpoons \text{H}_{(\text{solv})}^- \quad \Delta G_{\text{H}^\bullet/\text{H}^-}^o = 26 \text{ kcal mol}^{-1} \quad \text{S4.2}$$

Standard free energy values at 1 M  $\text{H}^\bullet$ ,  $\text{H}^+$ , and  $\text{H}^-$ , referenced to the  $\text{Fc}^{+/0}$  couple.

According to the diagram above, a series of mathematical representations may be written to quantify a particular thermodynamic quantity of interest, yet they all must afford self-consistent values throughout. Equation S5.4 describes the homolytic bond dissociation free energy,  $\Delta G_{\text{H}^\bullet}$ , of a metal hydride,  $[\text{M}-\text{H}]^+$  in terms of its hydricity value and the first reduction potential of the parent *solvent* complex,  $[\text{M}]^{2+}$ .

$$[\text{M}-\text{H}]^+ \rightleftharpoons [\text{M}]^{2+} + \text{H}^- \quad \Delta G_{\text{H}^-} \quad (-39)^{\text{a}} \quad (-51)^{\text{b}} \quad \text{S5.1}$$

$$[\text{M}]^{2+} + \text{e}^- \rightleftharpoons [\text{M}]^+ \quad -nFE_{1/2}(\text{M}^{2+/+}); n = 1 \quad (23.06 \times 1.68)^{\text{a}} \quad (23.06 \times 1.66)^{\text{b}} \quad \text{S5.2}$$

$$\text{H}^- \rightleftharpoons \text{H}^\bullet + \text{e}^- \quad -\Delta G_{\text{H}^\bullet/\text{H}^-} \quad (-26)^{\text{a}} \quad (-26)^{\text{b}} \quad \text{S5.3}$$

$$[\text{M}-\text{H}]^+ \rightleftharpoons [\text{M}]^+ + \text{H}^\bullet \quad \Delta G_{\text{H}^\bullet} = \Delta G_{\text{H}^-} - FE_{1/2}(\text{M}^{2+/+}) - \Delta G_{\text{H}^\bullet/\text{H}^-} \quad \text{S5.4}$$

<sup>a</sup>Calculation for  $[\text{Ru}(\text{tpy})(\text{bpy})(\text{H})]^+$ . <sup>b</sup>Calculation for  $[\text{Ru}(\text{dmb})_2(\text{CO})(\text{H})]^+$ . Values are given in kcal/mol<sup>-1</sup>.

Direct application of Equation S5.4 provided  $\Delta G_{\text{H}^\bullet} = 52 \text{ kcal mol}^{-1}$  for  $[\text{Ru}(\text{tpy})(\text{bpy})(\text{H})]^+$  and  $\Delta G_{\text{H}^\bullet} = 63 \text{ kcal mol}^{-1}$  for  $[\text{Ru}(\text{dmb})_2(\text{CO})(\text{H})]^+$ .

The free energy for proton dissociation of a metal hydride,  $\Delta G_{\text{H}^+}$ , was determined by combining  $\Delta G_{\text{H}^\bullet}$  and the second reduction of the parent *solvent* complex according to the set of equations S6.1–S6.4.

$$[\text{M}-\text{H}]^+ \rightleftharpoons [\text{M}]^+ + \text{H}^\bullet \quad \Delta G_{\text{H}^\bullet} \quad (51.7)^{\text{a}} \quad (63.3)^{\text{b}} \quad \text{S6.1}$$

$$[\text{M}]^+ + \text{e}^- \rightleftharpoons [\text{M}]^0 \quad -nFE_{1/2}(\text{M}^{+/0}); n = 1 \quad (23.06 \times 1.98)^{\text{a}} \quad (23.06 \times 1.86)^{\text{b}} \quad \text{S6.2}$$

$$\text{H}^\bullet \rightleftharpoons \text{H}^+ + \text{e}^- \quad -\Delta G_{\text{H}^+/\text{H}^\bullet} \quad (-53.6)^{\text{a}} \quad (-53.6)^{\text{b}} \quad \text{S6.3}$$

$$[\text{M}-\text{H}]^+ \rightleftharpoons [\text{M}]^0 + \text{H}^+ \quad \Delta G_{\text{H}^+} = \Delta G_{\text{H}^\bullet} - FE_{1/2}(\text{M}^{+/0}) - \Delta G_{\text{H}^+/\text{H}^\bullet} \quad \text{S6.4}$$

<sup>a</sup>Calculation for  $[\text{Ru}(\text{tpy})(\text{bpy})(\text{H})]^+$ . <sup>b</sup>Calculation for  $[\text{Ru}(\text{dmb})_2(\text{CO})(\text{H})]^+$ . Values are given in kcal/mol<sup>-1</sup>.

Direct application of equation S6.4 gave  $\Delta G_{\text{H}^+} = 53 \text{ kcal mol}^{-1}$  for  $[\text{Ru}(\text{dmb})_2(\text{CO})(\text{H})]^+$ . With the free energy for proton dissociation being related to the acidity of a metal-hydride bond through  $\Delta G_{\text{H}^+} = 1.364 \times \text{p}K_{\text{a}}$ ,<sup>8</sup>  $[\text{Ru}(\text{dmb})_2(\text{CO})(\text{H})]^+$  has  $\text{p}K_{\text{a}} = 39$ . The methodology described above was also applied to  $[\text{Ru}(\text{tpy})(\text{bpy})(\text{H})]^+$ , from which  $\Delta G_{\text{H}^+} = 43 \text{ kcal mol}^{-1}$  and  $\text{p}K_{\text{a}} = 32$  were obtained. The hydricity value and reduction potentials for  $[\text{Ru}(\text{tpy})(\text{bpy})(\text{H})]^+$  were available from reference [6].<sup>5</sup>

The homolytic cleavage of the metal hydride bond for the singly-reduced complexes was calculated using the thermochemical cycle described by the set of equations S7.1–S7.4, which relate the acidity of the resting state of the metal hydride with its first reduction potential.

|                                                |                                                                                        |                          |                          |      |
|------------------------------------------------|----------------------------------------------------------------------------------------|--------------------------|--------------------------|------|
| $[M-H]^+ \rightleftharpoons [M]^0 + H^+$       | $\Delta G_{H^+}$                                                                       | (43.8) <sup>a</sup>      | (52.6) <sup>b</sup>      | S7.1 |
| $[M-H]^0 \rightleftharpoons [M-H]^+ + e^-$     | $nFE_{1/2}(M^{+/0}) ; n = 1$                                                           | $(-23.06 \times 1.98)^a$ | $(-23.06 \times 1.93)^b$ | S7.2 |
| $H^+ + e^- \rightleftharpoons H^\bullet$       | $\Delta G_{H^+/H^\bullet}$                                                             | (53.6) <sup>a</sup>      | (53.6) <sup>b</sup>      | S7.3 |
| $[M-H]^0 \rightleftharpoons [M]^0 + H^\bullet$ | $\Delta G_{H^\bullet} = \Delta G_{H^-} - FE_{1/2}(M^{+/0}) - \Delta G_{H^\bullet/H^-}$ |                          |                          | S7.4 |

<sup>a</sup>Calculation for [Ru(tpy)(bpy)(H)]<sup>0</sup>. <sup>b</sup>Calculation for [Ru(dmb)<sub>2</sub>(CO)(H)]<sup>0</sup>. Values are given in kcal/mol<sup>-1</sup>.

The obtained values were,  $\Delta G_{H^\bullet} = 52$  kcal mol<sup>-1</sup> for [Ru(tpy)(bpy)(H)]<sup>0</sup> and  $\Delta G_{H^\bullet} = 62$  kcal mol<sup>-1</sup> for [Ru(dmb)<sub>2</sub>(CO)(H)]<sup>0</sup>.

The hydricity of singly-reduced [Ru(dmb)<sub>2</sub>(CO)(H)]<sup>0</sup> was determined according to the set of equations S8.1–S8.4, which relate the  $\Delta G_{H^\bullet}$  of the singly-reduced metal hydride with the second reduction potential of the parent *solvento* complex,

|                                                |                                                                                        |                          |                          |      |
|------------------------------------------------|----------------------------------------------------------------------------------------|--------------------------|--------------------------|------|
| $[M-H]^0 \rightleftharpoons [M]^0 + H^\bullet$ | $\Delta G_{H^\bullet}$                                                                 | (51.7) <sup>a</sup>      | (61.7) <sup>b</sup>      | S8.1 |
| $[M]^0 \rightleftharpoons [M]^+ + e^-$         | $nFE_{1/2}(M^{+/0}) ; n = 1$                                                           | $(-23.06 \times 2.23)^a$ | $(-23.06 \times 2.13)^b$ | S8.2 |
| $H^\bullet + e^- \rightleftharpoons H^-$       | $\Delta G_{H^\bullet/H^-}$                                                             | (26) <sup>a</sup>        | (26) <sup>b</sup>        | S8.3 |
| $[M-H]^0 \rightleftharpoons [M]^+ + H^-$       | $\Delta G_{H^-} = \Delta G_{H^\bullet} + FE_{1/2}(M^{+/0}) + \Delta G_{H^\bullet/H^-}$ |                          |                          | S8.4 |

<sup>a</sup>Calculation for [Ru(tpy)(bpy)(H)]<sup>0</sup>. <sup>b</sup>Calculation for [Ru(dmb)<sub>2</sub>(CO)(H)]<sup>0</sup>. Values are given in kcal/mol<sup>-1</sup>.

which provided  $\Delta G_{H^-} = 32$  kcal mol<sup>-1</sup> for [Ru(tpy)(bpy)(H)]<sup>0</sup> and  $\Delta G_{H^-} = 45$  kcal mol<sup>-1</sup> for [Ru(dmb)<sub>2</sub>(CO)(H)]<sup>0</sup>. The calculated  $\Delta G_{H^-}$  values for two different redox states of the same metal hydride show that ligand-based reductions inductively increase the electron density at the metal-hydride bond, which is translated to lower hydricity values – or better hydride donors – while the homolytic cleavage to yield a H<sup>•</sup>-atom is little affected. This observation is in accordance with the fact that reported hydricities for metal hydrides span a wide range of more than 50 kcal mol<sup>-1</sup>,<sup>8, 13</sup> while  $\Delta G_{H^\bullet}$  typically varies within a narrower range of 20 kcal mol<sup>-1</sup>.<sup>14-17</sup>

The acidity of singly-reduced metal hydrides is usually challenging to obtain using thermochemical cycles, as it requires a knowledge of the third reduction of the *solvento* complex, according to the set of equations S9.1–S9.4.

|                                                |                               |                         |                         |      |
|------------------------------------------------|-------------------------------|-------------------------|-------------------------|------|
| $[M-H]^0 \rightleftharpoons [M]^0 + H^\bullet$ | $\Delta G_{H^\bullet}$        | (51.7) <sup>a</sup>     | (61.7) <sup>b</sup>     | S9.1 |
| $[M]^0 + e^- \rightleftharpoons [M]^-$         | $-nFE_{1/2}(M^{0/-}) ; n = 1$ | $(23.06 \times 2.33)^a$ | $(23.06 \times 2.18)^b$ | S9.2 |
| $H^\bullet \rightleftharpoons H^+ + e^-$       | $-\Delta G_{H^+/H^\bullet}$   | $(-53.6)^a$             | $(-53.6)^b$             | S9.3 |

$$[M-H]^0 \rightleftharpoons [M]^- + H^+ \quad \Delta G_{H^+} = \Delta G_{H^\bullet} - FE_{1/2}(M^{0/-}) - \Delta G_{H^+/H^\bullet} \quad S9.4$$

<sup>a</sup>Calculation for [Ru(tpy)(bpy)(H)]<sup>0</sup>. <sup>b</sup>Calculation for [Ru(dmb)<sub>2</sub>(CO)(H)]<sup>0</sup>. Values are given in kcal/mol<sup>-1</sup>.

For [Ru(tpy)(bpy)(H)]<sup>+</sup>, the third reduction potential of the parent [Ru(tpy)(bpy)(CH<sub>3</sub>CN)]<sup>2+</sup> has been reported to occur at  $E_{1/2}(M^{0/-}) = -2.33$  V vs Fc<sup>+0</sup>,<sup>5</sup> and by using equation S9.4, the acidity of [Ru(tpy)(bpy)(H)]<sup>0</sup> is  $pK_a = 38$ . For [Ru(dmb)<sub>2</sub>(CO)(H)]<sup>0</sup> studied here, the third reduction potential of [Ru(dmb)<sub>2</sub>(CO)(CH<sub>3</sub>CN)]<sup>2+</sup> is in fact related to the one-electron reduction of the 5-coordinate [Ru(dmb)<sub>2</sub>(CO)]<sup>0/-</sup>, and by using this reduction,  $E_{1/2}(M^{0/-}) = -2.18$  V vs Fc<sup>+0</sup>, the acidity of [Ru(dmb)<sub>2</sub>(CO)(H)]<sup>0</sup> was estimated as  $pK_a = 43$ .

The homolytic cleavage of the doubly-reduced [M-H]<sup>-</sup> was determined using the set of equations S10.1–S10.4, which relate the acidity of the singly-reduced [M-H]<sup>0</sup> with the second reduction of the metal hydride, [M-H]<sup>0/-</sup>.

|                                            |                              |                          |                          |       |
|--------------------------------------------|------------------------------|--------------------------|--------------------------|-------|
| $[M-H]^0 \rightleftharpoons [M]^- + H^+$   | $\Delta G_{H^+}$             | (51.9) <sup>a</sup>      | (58.3) <sup>b</sup>      | S10.1 |
| $[M-H]^- \rightleftharpoons [M-H]^0 + e^-$ | $nFE_{1/2}(M^{0/-}) ; n = 1$ | $(-23.06 \times 2.23)^a$ | $(-23.06 \times 2.13)^b$ | S10.2 |
| $H^+ + e^- \rightleftharpoons H^\bullet$   | $\Delta G_{H^+/H^\bullet}$   | $(53.6)^a$               | $(53.6)^b$               | S10.3 |

$$[M-H]^- \rightleftharpoons [M]^- + H^\bullet \quad \Delta G_{H^\bullet} = \Delta G_{H^+} + FE_{1/2}(M^{0/-}) + \Delta G_{H^+/H^\bullet} \quad S10.4$$

<sup>a</sup>Calculation for [Ru(tpy)(bpy)(H)]<sup>-</sup>. <sup>b</sup>Calculation for [Ru(dmb)<sub>2</sub>(CO)(H)]<sup>-</sup>. Values are given in kcal/mol<sup>-1</sup>.

Equation S10.4 provided  $\Delta G_{H^\bullet} = 54$  kcal mol<sup>-1</sup> for [Ru(tpy)(bpy)(H)]<sup>-</sup> and  $\Delta G_{H^\bullet} = 63$  kcal mol<sup>-1</sup> for [Ru(dmb)<sub>2</sub>(CO)(H)]<sup>-</sup>.

The hydricity of a doubly-reduced [M-H]<sup>-</sup> was determined by direct application of equation S11.4, which relates the free energy for the homolytic cleavage of [M-H]<sup>-</sup>,  $\Delta G_{H^\bullet}$ , with the third reduction of the parent *solvento* complex, [M]<sup>0/-</sup>.

|                                                |                              |                          |                          |       |
|------------------------------------------------|------------------------------|--------------------------|--------------------------|-------|
| $[M-H]^- \rightleftharpoons [M]^- + H^\bullet$ | $\Delta G_{H^\bullet}$       | (54) <sup>a</sup>        | (62.8) <sup>b</sup>      | S11.1 |
| $[M]^- \rightleftharpoons [M]^0 + e^-$         | $nFE_{1/2}(M^{0/-}) ; n = 1$ | $(-23.06 \times 2.33)^a$ | $(-23.06 \times 2.13)^b$ | S11.2 |
| $H^\bullet + e^- \rightleftharpoons H^-$       | $\Delta G_{H^\bullet/H^-}$   | (26) <sup>a</sup>        | (26) <sup>b</sup>        | S11.3 |

$$[M-H]^0 \rightleftharpoons [M]^+ + H^- \quad \Delta G_{H^-} = \Delta G_{H^\bullet} + FE_{1/2}(M^{0/-}) + \Delta G_{H^\bullet/H^-} \quad S11.4$$

<sup>a</sup>Calculation for [Ru(tpy)(bpy)(H)]<sup>-</sup>. <sup>b</sup>Calculation for [Ru(dmb)<sub>2</sub>(CO)(H)]<sup>-</sup>. Values are given in kcal/mol<sup>-1</sup>.



The obtained values were  $\Delta G_{H^-} = 26 \text{ kcal mol}^{-1}$  for  $[\text{Ru}(\text{tpy})(\text{bpy})(\text{H})]^-$  and  $\Delta G_{H^-} = 39 \text{ kcal mol}^{-1}$  for  $[\text{Ru}(\text{dmb})_2(\text{CO})(\text{H})]^-$ .

Thermodynamic relationships that follow the diagram described in the beginning of this section do not allow for estimation of  $pK_a$  values for metal hydrides, as thermodynamic quantities at higher reducing states are likely inaccessible. The trend in which a metal-hydride becomes more basic ( $pK_a$  increases) as it becomes more hydridic was realized for  $[\text{Ru}(\text{dmb})_2(\text{CO})(\text{H})]^+$  and  $[\text{Ru}(\text{tpy})(\text{bpy})(\text{H})]^+$  and their corresponding singly-reduced forms. This was also true for  $[\text{Ir}(\text{tpy})(\text{ppy})(\text{H})]^+$ , where  $\text{ppy} = 2\text{-phenylpyridine}$ , by using reported hydricities and reduction potentials,<sup>12</sup> although this analysis will not be discussed here. The question of whether the hydricity and  $pK_a$  of the doubly-reduced metal hydrides may follow a monotonic linear trend, is of interest. Shown in Scheme 3 of the main text, the solid red and blue spheres are the  $(\Delta G_{H^-}, pK_a)$  xy-pairs of the resting and singly-reduced states of the listed metal hydrides. By considering that a linear trend connects the hydricities and  $pK_a$  of a metal hydride at different redox states with common  $\Delta G_{H^\bullet}$ , the two  $(\Delta G_{H^-}, pK_a)$  points for each metal hydride in Scheme 3 were used to find the equation of a *line* that connects them,

$$\Delta G_{H^-} = - \left( \frac{E_{1/2}(+/0) - E_{1/2}(2+/+)}{E_{1/2}(0/-) - E_{1/2}(+/0)} \right) \Delta G_{H^+} - C \quad \text{S12}$$

where  $\Delta G_{H^+} = 1.364 \times pK_a$  and  $C$  is a constant. The ratio of the differences in reduction potentials in equation S12 was 0.74 for  $[\text{Ru}(\text{dmb})_2(\text{CO})(\text{H})]^+$  and 0.86 for  $[\text{Ru}(\text{tpy})(\text{bpy})(\text{H})]^+$ . In order to generalize the utilization of equation S12, the average value (0.80) was taken, which gives,

$$\Delta G_{H^-} = -1.09 \times pK_a - C \quad \text{S13}$$

Using the known  $\Delta G_{H^-}$  and  $pK_a$  values, the constant  $C$  was obtained for each metal hydride;  $C = 92$  and  $74$  for  $\text{Ru}(\text{CO})(\text{H})^{+ \text{ or } 0}$  and  $\text{Ru}(\text{tpy})(\text{bpy})(\text{H})^{+ \text{ or } 0}$ , respectively. The final form of equation S13 is unique to each metal hydride and its displacement from the Cartesian origin in the x-direction indicates a relative measure of the homolytic bond dissociation free energy,  $\Delta G_{H^\bullet}$ , of a metal hydride – the more distant the  $(\Delta G_{H^-}, pK_a)$  trend is from the origin in the x-direction, the larger  $\Delta G_{H^\bullet}$  will be. By applying the known hydricities of the doubly-reduced metal hydrides, their acidities at this corresponding redox state are  $pK_a = 49$  for  $\text{Ru}(\text{CO})(\text{H})^-$  and  $pK_a = 44$  for  $\text{Ru}(\text{tpy})(\text{bpy})(\text{H})^-$ .

### 10. Thermodynamic relationships for the determination of the $pK_a$ of $BIH^{+}$ .

The  $pK_a$  of the radical cation,  $BIH^{+}$  was determined according to the thermodynamic relationships described in the diagram below. Note that, for illustrative clarity of the diagram, the signs (*positive* or *negative*) that accompany each thermodynamic quantity for a specific reaction path were omitted.

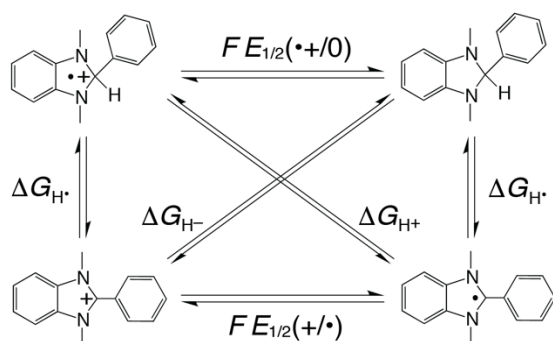

First, the homolytic bond cleavage of  $BIH$  was determined,  $\Delta G_{H\bullet} = 71.6 \text{ kcal mol}^{-1}$ , according to the set of equations S14.1-S14.4. The hydricity and reduction potentials were available from references [10,11].<sup>18-19</sup>

|                                                     |                                                                                         |                       |       |
|-----------------------------------------------------|-----------------------------------------------------------------------------------------|-----------------------|-------|
| $[BIH] \rightleftharpoons [BI^+] + H^-$             | $\Delta G_{H^-}$                                                                        | (50.1)                | S14.1 |
| $[BI^+] + e^- \rightleftharpoons [BI^\bullet]$      | $-nFE_{1/2}(BI^{+/•}) ; n = 1$                                                          | $(23.06 \times 2.06)$ | S14.2 |
| $H^- \rightleftharpoons H^\bullet + e^-$            | $-\Delta G_{H^\bullet/H^-}$                                                             | (-26)                 | S14.3 |
| $[BIH] \rightleftharpoons [BI^\bullet] + H^\bullet$ | $\Delta G_{H^\bullet} = \Delta G_{H^-} - FE_{1/2}(BI^{+/•}) - \Delta G_{H^\bullet/H^-}$ |                       | S14.4 |

With the obtained value for  $\Delta G_{H\bullet}$ , the  $pK_a = 14.4$  was calculated using the thermodynamic relationships described by the set of equations S15.1-S15.4

|                                                     |                                                                                                                     |                       |       |
|-----------------------------------------------------|---------------------------------------------------------------------------------------------------------------------|-----------------------|-------|
| $[BIH] \rightleftharpoons [BI^\bullet] + H^\bullet$ | $\Delta G_{H^\bullet}$                                                                                              | (71.6)                | S15.1 |
| $[BIH^{+•}] + e^- \rightleftharpoons [BIH]$         | $-nFE_{1/2}(BI^{\bullet+/0}) ; n = 1$                                                                               | $(23.06 \times 0.07)$ | S15.2 |
| $H^\bullet \rightleftharpoons H^+ + e^-$            | $-\Delta G_{H^\bullet/H^+}$                                                                                         | (-53.6)               | S15.3 |
| $[BIH] \rightleftharpoons [BI^+] + H^-$             | $\Delta G_{H^+} = 1.364 \times pK_a = \Delta G_{H^\bullet} - nFE_{1/2}(BI^{\bullet+/0}) - \Delta G_{H^\bullet/H^+}$ |                       | S15.4 |

## 11. Supplementary DFT data

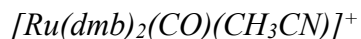

Transition State for  $CH_3CN$  release

|    |    |           |           |           |
|----|----|-----------|-----------|-----------|
| 1  | Ru | 0.023013  | -1.75E-01 | -0.658256 |
| 2  | N  | 0.611822  | -4.17E-01 | 1.45619   |
| 3  | C  | 1.817728  | 0.106791  | 1.765654  |
| 4  | C  | 2.296645  | 0.064072  | 3.075052  |
| 5  | H  | 3.263221  | 0.487894  | 3.33028   |
| 6  | C  | 1.523474  | -0.527011 | 4.064123  |
| 7  | C  | 0.283761  | -1.060986 | 3.731989  |
| 8  | H  | -0.351807 | -1.531735 | 4.476371  |
| 9  | C  | -0.132934 | -0.979718 | 2.411814  |
| 10 | H  | -1.097656 | -1.379442 | 2.098787  |
| 11 | N  | 1.950621  | 0.712604  | -0.565391 |
| 12 | C  | 2.560103  | 0.721479  | 0.651273  |
| 13 | C  | 3.816461  | 1.301526  | 0.81956   |
| 14 | H  | 4.294415  | 1.301299  | 1.79453   |
| 15 | C  | 4.461918  | 1.88295   | -0.260567 |
| 16 | C  | 3.830644  | 1.876268  | -1.498326 |
| 17 | H  | 4.291294  | 2.318967  | -2.376813 |
| 18 | C  | 2.583207  | 1.284296  | -1.604868 |
| 19 | H  | 2.05977   | 1.25757   | -2.557004 |
| 20 | N  | -1.913748 | -1.018063 | -0.357664 |
| 21 | C  | -2.888635 | -0.162331 | 0.058735  |
| 22 | C  | -4.130314 | -0.65034  | 0.480974  |
| 23 | H  | -4.884722 | 0.040496  | 0.849511  |
| 24 | C  | -4.374836 | -2.011228 | 0.462101  |
| 25 | C  | -3.369444 | -2.878219 | 0.024967  |
| 26 | H  | -3.521625 | -3.95309  | -0.011894 |
| 27 | C  | -2.158287 | -2.339955 | -0.367561 |
| 28 | H  | -1.334998 | -2.965844 | -0.708195 |
| 29 | N  | -1.205146 | 1.524931  | 0.05947   |
| 30 | C  | -2.540138 | 1.251822  | 0.050079  |
| 31 | C  | -3.489585 | 2.278408  | 0.007049  |
| 32 | H  | -4.549142 | 2.038174  | -0.049956 |
| 33 | C  | -3.068641 | 3.596053  | 0.007648  |
| 34 | C  | -1.694824 | 3.869131  | 0.037872  |
| 35 | H  | -1.321521 | 4.88962   | 0.059258  |
| 36 | C  | -0.808721 | 2.810474  | 0.044423  |
| 37 | H  | 0.269738  | 2.972948  | 0.05192   |
| 38 | C  | -0.267608 | 0.104812  | -2.457864 |
| 39 | O  | -0.439325 | 0.306733  | -3.596665 |
| 40 | H  | 1.888299  | -0.56675  | 5.087539  |
| 41 | H  | 5.442303  | 2.335076  | -0.134831 |
| 42 | H  | -5.334091 | -2.399677 | 0.7959    |
| 43 | H  | -3.794345 | 4.40497   | -0.02797  |
| 44 | N  | 1.149092  | -2.274505 | -0.915474 |
| 45 | C  | 1.896184  | -3.113086 | -1.206812 |
| 46 | C  | 2.825855  | -4.160631 | -1.57512  |
| 47 | H  | 3.843268  | -3.759442 | -1.627522 |
| 48 | H  | 2.801223  | -4.965405 | -0.833186 |
| 49 | H  | 2.557845  | -4.573132 | -2.553239 |

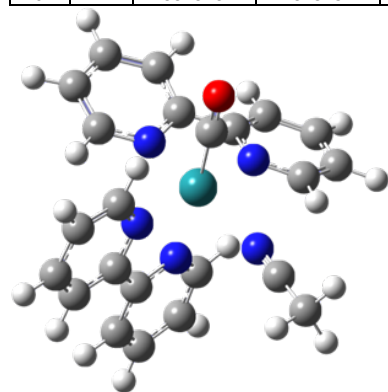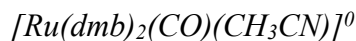

Transition State for  $CH_3CN$  release

|    |    |           |           |           |
|----|----|-----------|-----------|-----------|
| 1  | Ru | 0.005232  | 4.08E-01  | -0.866245 |
| 2  | N  | -0.110175 | 4.96E-01  | 1.254979  |
| 3  | C  | -1.402568 | 0.450209  | 1.736933  |
| 4  | C  | -1.630172 | 0.397726  | 3.132649  |
| 5  | H  | -2.649604 | 0.341676  | 3.508979  |
| 6  | C  | -0.575904 | 0.464715  | 4.007438  |
| 7  | C  | 0.738528  | 0.588605  | 3.496899  |
| 8  | H  | 1.599359  | 0.666537  | 4.15544   |
| 9  | C  | 0.911501  | 0.590564  | 2.134078  |
| 10 | H  | 1.907454  | 0.656343  | 1.692409  |
| 11 | N  | -2.005496 | 0.822526  | -0.541951 |
| 12 | C  | -2.42858  | 0.523541  | 0.749723  |
| 13 | C  | -3.797403 | 0.299722  | 1.01172   |
| 14 | H  | -4.105705 | 0.014555  | 2.015826  |
| 15 | C  | -4.731134 | 0.415326  | 0.012413  |
| 16 | C  | -4.295727 | 0.763076  | -1.287094 |
| 17 | H  | -4.997816 | 0.889144  | -2.10719  |
| 18 | C  | -2.951758 | 0.93835   | -1.507747 |
| 19 | H  | -2.578891 | 1.184037  | -2.500981 |
| 20 | N  | 2.038802  | -0.230065 | -0.675852 |
| 21 | C  | 2.099397  | -1.494161 | -0.139298 |
| 22 | C  | 3.345142  | -2.026872 | 0.250492  |
| 23 | H  | 3.394996  | -3.028375 | 0.672563  |
| 24 | C  | 4.495138  | -1.293975 | 0.060265  |
| 25 | C  | 4.419745  | -0.031171 | -0.556258 |
| 26 | H  | 5.30622   | 0.572185  | -0.730714 |
| 27 | C  | 3.17392   | 0.443541  | -0.916577 |
| 28 | H  | 3.048571  | 1.422959  | -1.378266 |
| 29 | N  | -0.196189 | -1.652068 | -0.765652 |
| 30 | C  | 0.848467  | -2.190279 | -0.032598 |
| 31 | C  | 0.644398  | -3.372405 | 0.711188  |
| 32 | H  | 1.435245  | -3.739984 | 1.363205  |
| 33 | C  | -0.552071 | -4.042655 | 0.624455  |
| 34 | C  | -1.576853 | -3.526917 | -0.204316 |
| 35 | H  | -2.519432 | -4.051876 | -0.33494  |
| 36 | C  | -1.366251 | -2.324343 | -0.835154 |
| 37 | H  | -2.145141 | -1.849566 | -1.434841 |
| 38 | C  | -0.040822 | 0.492504  | -2.726521 |
| 39 | O  | -0.11271  | 0.565451  | -3.890961 |
| 40 | H  | -0.751058 | 0.444943  | 5.081162  |
| 41 | H  | -5.784644 | 0.237326  | 0.216467  |
| 42 | H  | 5.457973  | -1.702073 | 0.361036  |
| 43 | H  | -0.711725 | -4.956542 | 1.192812  |
| 44 | N  | 0.716104  | 2.768573  | -0.656332 |
| 45 | C  | 1.40463   | 3.414248  | 0.023349  |
| 46 | C  | 2.28651   | 4.170294  | 0.889387  |
| 47 | H  | 2.47459   | 5.167326  | 0.477177  |
| 48 | H  | 1.838005  | 4.277016  | 1.882782  |
| 49 | H  | 3.242968  | 3.64417   | 0.990653  |

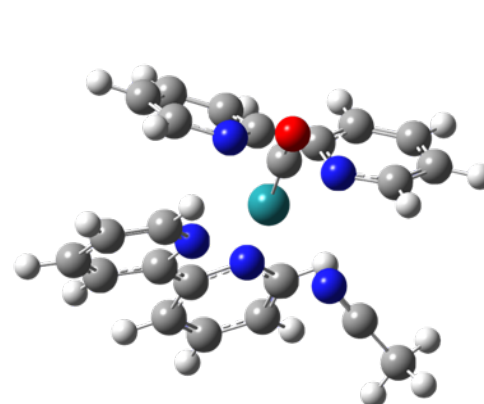

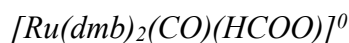

Transition State for O-bound HCOO<sup>-</sup> isomer

|    |    |           |           |           |
|----|----|-----------|-----------|-----------|
| 1  | Ru | 0.000991  | 0.666708  | -0.363595 |
| 2  | N  | -0.491278 | -0.519501 | 1.416383  |
| 3  | C  | -1.761774 | -0.962768 | 1.480059  |
| 4  | C  | -2.18207  | -1.779619 | 2.528966  |
| 5  | H  | -3.204232 | -2.143178 | 2.579301  |
| 6  | C  | -1.274287 | -2.131377 | 3.518261  |
| 7  | C  | 0.030251  | -1.657772 | 3.444796  |
| 8  | H  | 0.768396  | -1.90598  | 4.202039  |
| 9  | C  | 0.379371  | -0.850878 | 2.371109  |
| 10 | H  | 1.384001  | -0.442139 | 2.264419  |
| 11 | N  | -2.074988 | 0.245872  | -0.575619 |
| 12 | C  | -2.649221 | -0.511376 | 0.393146  |
| 13 | C  | -4.007269 | -0.820608 | 0.350534  |
| 14 | H  | -4.458089 | -1.422219 | 1.13406   |
| 15 | C  | -4.787781 | -0.351064 | -0.694871 |
| 16 | C  | -4.192656 | 0.429023  | -1.678734 |
| 17 | H  | -4.761561 | 0.823481  | -2.515721 |
| 18 | C  | -2.838933 | 0.704924  | -1.578716 |
| 19 | H  | -2.33564  | 1.316651  | -2.32275  |
| 20 | N  | 2.019683  | 0.798078  | 0.147707  |
| 21 | C  | 2.772057  | -0.31045  | -0.212581 |
| 22 | C  | 4.148316  | -0.342999 | 0.13305   |
| 23 | H  | 4.748571  | -1.208222 | -0.140853 |
| 24 | C  | 4.715715  | 0.704268  | 0.811045  |
| 25 | C  | 3.925327  | 1.823504  | 1.166564  |
| 26 | H  | 4.340762  | 2.6688    | 1.70749   |
| 27 | C  | 2.593522  | 1.816793  | 0.808173  |
| 28 | H  | 1.919593  | 2.631914  | 1.066897  |
| 29 | N  | 0.714478  | -1.116028 | -1.102007 |
| 30 | C  | 2.071086  | -1.337945 | -0.887741 |
| 31 | C  | 2.639054  | -2.551519 | -1.356507 |
| 32 | H  | 3.700029  | -2.734697 | -1.199068 |
| 33 | C  | 1.867154  | -3.481579 | -1.999883 |
| 34 | C  | 0.488005  | -3.227202 | -2.205482 |
| 35 | H  | -0.157473 | -3.93693  | -2.714396 |
| 36 | C  | -0.026239 | -2.03596  | -1.743781 |
| 37 | H  | -1.076159 | -1.781357 | -1.885368 |
| 38 | C  | 0.242699  | 1.53867   | -1.962417 |
| 39 | O  | 0.345459  | 2.071509  | -2.993787 |
| 40 | H  | -1.58716  | -2.76921  | 4.341398  |
| 41 | H  | -5.847555 | -0.589394 | -0.736663 |
| 42 | H  | 5.771226  | 0.67251   | 1.075042  |
| 43 | H  | 2.313032  | -4.408626 | -2.354801 |
| 44 | O  | -0.342952 | 2.273099  | 1.74159   |
| 45 | C  | -0.920716 | 3.128826  | 1.038496  |
| 46 | O  | -1.10454  | 3.060157  | -0.198276 |
| 47 | H  | -1.310013 | 4.039039  | 1.554784  |

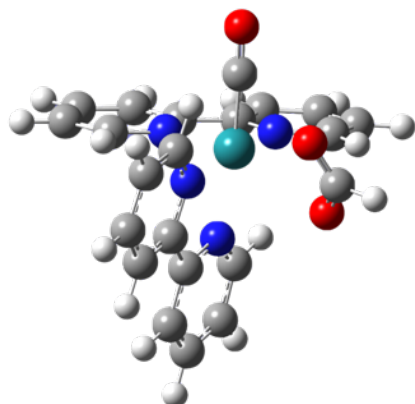

Transition State for HCOO<sup>-</sup> release

|    |    |          |          |          |
|----|----|----------|----------|----------|
| 1  | Ru | -0.10048 | 0.767917 | -0.17755 |
| 2  | N  | -0.40233 | -1.00181 | 1.067372 |
| 3  | C  | -1.6359  | -1.55322 | 0.993179 |
| 4  | C  | -1.92534 | -2.74803 | 1.652812 |
| 5  | H  | -2.9111  | -3.19798 | 1.578551 |
| 6  | C  | -0.93839 | -3.37117 | 2.401711 |
| 7  | C  | 0.319481 | -2.78424 | 2.489433 |
| 8  | H  | 1.118342 | -3.23332 | 3.072623 |
| 9  | C  | 0.540414 | -1.59872 | 1.806403 |
| 10 | H  | 1.507855 | -1.09934 | 1.842742 |
| 11 | N  | -2.14308 | 0.291342 | -0.45541 |
| 12 | C  | -2.61547 | -0.81173 | 0.188164 |
| 13 | C  | -3.95432 | -1.19105 | 0.091457 |
| 14 | H  | -4.31452 | -2.06738 | 0.622851 |
| 15 | C  | -4.83079 | -0.442   | -0.67637 |
| 16 | C  | -4.34441 | 0.68736  | -1.32823 |
| 17 | H  | -4.98958 | 1.313476 | -1.93857 |
| 18 | C  | -3.00862 | 1.018285 | -1.18766 |
| 19 | H  | -2.59788 | 1.902725 | -1.66606 |
| 20 | N  | 2.034447 | 0.943553 | 0.225362 |
| 21 | C  | 2.873716 | 0.034506 | -0.32803 |
| 22 | C  | 4.258784 | 0.170567 | -0.21251 |
| 23 | H  | 4.914633 | -0.55064 | -0.69492 |
| 24 | C  | 4.780861 | 1.242848 | 0.4938   |
| 25 | C  | 3.908888 | 2.16335  | 1.072471 |
| 26 | H  | 4.275955 | 3.011735 | 1.643423 |
| 27 | C  | 2.545557 | 1.979237 | 0.906214 |
| 28 | H  | 1.80798  | 2.654826 | 1.337175 |
| 29 | N  | 1.023709 | -0.86475 | -1.55588 |
| 30 | C  | 2.23504  | -1.10545 | -0.99977 |
| 31 | C  | 2.803361 | -2.38134 | -0.97691 |
| 32 | H  | 3.764511 | -2.54178 | -0.49198 |
| 33 | C  | 2.105277 | -3.44263 | -1.53312 |
| 34 | C  | 0.852322 | -3.19783 | -2.10084 |
| 35 | H  | 0.272551 | -3.99733 | -2.55561 |
| 36 | C  | 0.360114 | -1.90344 | -2.08864 |
| 37 | H  | -0.61295 | -1.66827 | -2.52349 |
| 38 | C  | -0.07252 | 2.168063 | -1.37208 |
| 39 | O  | -0.11015 | 3.039268 | -2.15624 |
| 40 | H  | -1.15219 | -4.30561 | 2.915006 |
| 41 | H  | -5.87552 | -0.73083 | -0.75892 |
| 42 | H  | 5.857634 | 1.365199 | 0.586688 |
| 43 | H  | 2.520402 | -4.4476  | -1.51179 |
| 44 | O  | -0.51635 | 2.01041  | 1.774029 |
| 45 | C  | -1.25113 | 3.044458 | 1.704438 |
| 46 | O  | -1.79772 | 3.551975 | 0.720756 |
| 47 | H  | -1.40201 | 3.545309 | 2.700424 |

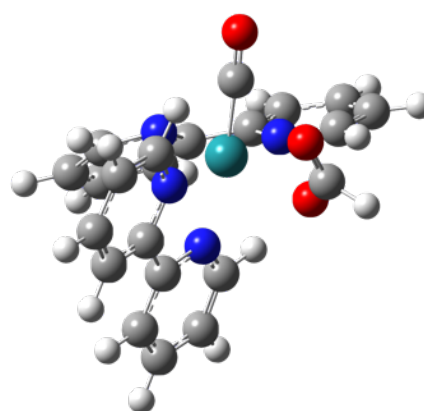

$[Ru(dmb)_2(CO)(HCOO)]^-$   
 Transition State for  $HCOO^-$  release

|    |    |           |           |           |
|----|----|-----------|-----------|-----------|
| 1  | Ru | -4.85E-02 | 0.705473  | -0.310973 |
| 2  | N  | -1.66E-01 | -0.573882 | 1.378928  |
| 3  | C  | -1.377444 | -1.2273   | 1.499604  |
| 4  | C  | -1.546172 | -2.22841  | 2.486105  |
| 5  | H  | -2.500025 | -2.745685 | 2.567832  |
| 6  | C  | -0.526106 | -2.526281 | 3.352065  |
| 7  | C  | 0.696318  | -1.8196   | 3.243937  |
| 8  | H  | 1.525724  | -2.012777 | 3.919228  |
| 9  | C  | 0.821331  | -0.87686  | 2.25435   |
| 10 | H  | 1.749837  | -0.319681 | 2.122188  |
| 11 | N  | -2.079097 | 0.33184   | -0.158632 |
| 12 | C  | -2.401494 | -0.777133 | 0.616328  |
| 13 | C  | -3.672045 | -1.381138 | 0.498628  |
| 14 | H  | -3.894128 | -2.268849 | 1.08797   |
| 15 | C  | -4.615614 | -0.872369 | -0.358159 |
| 16 | C  | -4.288009 | 0.270924  | -1.122839 |
| 17 | H  | -5.004925 | 0.723618  | -1.803299 |
| 18 | C  | -3.035263 | 0.815935  | -0.994905 |
| 19 | H  | -2.746791 | 1.69205   | -1.573635 |
| 20 | N  | 2.083259  | 0.688691  | -0.170823 |
| 21 | C  | 2.607049  | -0.523447 | -0.527659 |
| 22 | C  | 3.977496  | -0.778308 | -0.343019 |
| 23 | H  | 4.393885  | -1.740599 | -0.633376 |
| 24 | C  | 4.791008  | 0.209808  | 0.172688  |
| 25 | C  | 4.244148  | 1.464079  | 0.484189  |
| 26 | H  | 4.855477  | 2.262464  | 0.896405  |
| 27 | C  | 2.888619  | 1.65894   | 0.28719   |
| 28 | H  | 2.372374  | 2.580889  | 0.557889  |
| 29 | N  | 0.479783  | -0.93376  | -1.529108 |
| 30 | C  | 1.668108  | -1.471211 | -1.081336 |
| 31 | C  | 1.907834  | -2.854378 | -1.186279 |
| 32 | H  | 2.804812  | -3.281865 | -0.740688 |
| 33 | C  | 0.99691   | -3.660858 | -1.831175 |
| 34 | C  | -0.17515  | -3.083237 | -2.364607 |
| 35 | H  | -0.899523 | -3.677617 | -2.915696 |
| 36 | C  | -0.401187 | -1.741799 | -2.155893 |
| 37 | H  | -1.321577 | -1.259267 | -2.490748 |
| 38 | C  | -0.156731 | 2.00663   | -1.63438  |
| 39 | O  | -0.272575 | 2.862322  | -2.427186 |
| 40 | H  | -0.659754 | -3.285373 | 4.120188  |
| 41 | H  | -5.593048 | -1.34122  | -0.448215 |
| 42 | H  | 5.85255   | 0.020141  | 0.319237  |
| 43 | H  | 1.174708  | -4.730504 | -1.919911 |
| 44 | O  | 0.258671  | 2.980536  | 1.258381  |
| 45 | C  | -0.491389 | 3.989105  | 1.172661  |
| 46 | O  | -1.698689 | 4.060067  | 0.890894  |
| 47 | H  | 0.027212  | 4.971284  | 1.393199  |

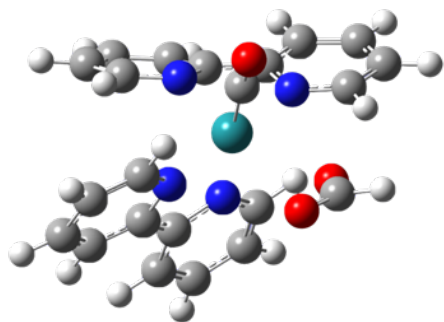

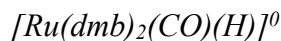

Transition State for Hydride Transfer to CO<sub>2</sub>

Hydride Abstraction Step

|    |    |           |           |           |
|----|----|-----------|-----------|-----------|
| 1  | Ru | -0.027319 | -0.124491 | -0.796043 |
| 2  | H  | 0.49857   | -1.685511 | -1.403938 |
| 3  | N  | 0.542931  | -0.684356 | 1.232758  |
| 4  | C  | 1.812325  | -0.372318 | 1.573253  |
| 5  | C  | 2.291859  | -0.643583 | 2.852896  |
| 6  | H  | 3.311547  | -0.394663 | 3.130797  |
| 7  | C  | 1.451148  | -1.242639 | 3.781161  |
| 8  | C  | 0.149403  | -1.561947 | 3.415659  |
| 9  | H  | -0.537953 | -2.033451 | 4.11193   |
| 10 | C  | -0.264767 | -1.264399 | 2.125547  |
| 11 | H  | -1.271787 | -1.495279 | 1.77904   |
| 12 | N  | 2.012225  | 0.446748  | -0.679986 |
| 13 | C  | 2.627731  | 0.246782  | 0.513439  |
| 14 | C  | 3.959107  | 0.608792  | 0.702745  |
| 15 | H  | 4.440966  | 0.447525  | 1.662378  |
| 16 | C  | 4.674574  | 1.176715  | -0.340845 |
| 17 | C  | 4.03964   | 1.371007  | -1.56081  |
| 18 | H  | 4.55601   | 1.809523  | -2.409751 |
| 19 | C  | 2.712467  | 0.993334  | -1.685901 |
| 20 | H  | 2.178889  | 1.132005  | -2.622909 |
| 21 | N  | -2.014884 | -0.677879 | -0.479371 |
| 22 | C  | -2.807741 | 0.310246  | 0.092803  |
| 23 | C  | -4.167871 | 0.012288  | 0.369994  |
| 24 | H  | -4.800699 | 0.776011  | 0.817207  |
| 25 | C  | -4.682863 | -1.224379 | 0.083057  |
| 26 | C  | -3.851055 | -2.214442 | -0.495385 |
| 27 | H  | -4.221637 | -3.208039 | -0.730382 |
| 28 | C  | -2.538587 | -1.885661 | -0.756556 |
| 29 | H  | -1.839453 | -2.60724  | -1.179682 |
| 30 | N  | -0.830143 | 1.644238  | 0.042654  |
| 31 | C  | -2.174757 | 1.548918  | 0.37055   |
| 32 | C  | -2.814867 | 2.678127  | 0.947263  |
| 33 | H  | -3.871236 | 2.621781  | 1.201625  |
| 34 | C  | -2.11327  | 3.831     | 1.182795  |
| 35 | C  | -0.739801 | 3.899128  | 0.844704  |
| 36 | H  | -0.149661 | 4.794606  | 1.016301  |
| 37 | C  | -0.161364 | 2.783451  | 0.277702  |
| 38 | H  | 0.88975   | 2.782224  | -0.013599 |
| 39 | C  | -0.335736 | 0.372136  | -2.544689 |
| 40 | O  | -0.498419 | 0.69305   | -3.653081 |
| 41 | H  | 1.814348  | -1.458759 | 4.782899  |
| 42 | H  | 5.714046  | 1.461757  | -0.200451 |
| 43 | H  | -5.726718 | -1.442798 | 0.300747  |
| 44 | H  | -2.612642 | 4.690735  | 1.625694  |
| 45 | C  | 1.0913    | -2.855036 | -0.937351 |
| 46 | O  | 2.28832   | -2.714802 | -0.976169 |
| 47 | O  | 0.19979   | -3.630646 | -0.686575 |

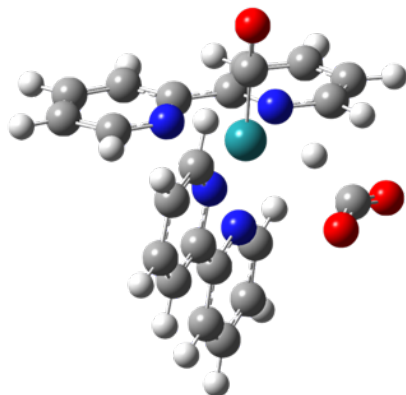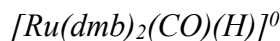

Transition State for Hydride Transfer to CO<sub>2</sub>

Rotational Rearrangement Step

|    |    |           |           |           |
|----|----|-----------|-----------|-----------|
| 1  | Ru | 0.098588  | 0.061841  | -0.571059 |
| 2  | H  | 1.170424  | -1.881526 | -3.080511 |
| 3  | N  | 0.646567  | -0.574706 | 1.450521  |
| 4  | C  | 1.924249  | -0.301244 | 1.794738  |
| 5  | C  | 2.425947  | -0.686238 | 3.038529  |
| 6  | H  | 3.449483  | -0.457734 | 3.320677  |
| 7  | C  | 1.602326  | -1.362932 | 3.925841  |
| 8  | C  | 0.289585  | -1.63975  | 3.559613  |
| 9  | H  | -0.388788 | -2.165845 | 4.225185  |
| 10 | C  | -0.144346 | -1.224579 | 2.31012   |
| 11 | H  | -1.163919 | -1.414798 | 1.975513  |
| 12 | N  | 2.043808  | 0.824712  | -0.326712 |
| 13 | C  | 2.711915  | 0.432046  | 0.793794  |
| 14 | C  | 4.062949  | 0.72564   | 0.970204  |
| 15 | H  | 4.58161   | 0.392681  | 1.864635  |
| 16 | C  | 4.751102  | 1.435517  | -0.000817 |
| 17 | C  | 4.062524  | 1.84279   | -1.138192 |
| 18 | H  | 4.551483  | 2.403088  | -1.930304 |
| 19 | C  | 2.723711  | 1.515895  | -1.260915 |
| 20 | H  | 2.158299  | 1.810651  | -2.141025 |
| 21 | N  | -1.780059 | -1.012453 | -0.561724 |
| 22 | C  | -2.929812 | -0.453894 | -0.120898 |
| 23 | C  | -4.093747 | -1.21296  | -0.001885 |
| 24 | H  | -5.001615 | -0.761901 | 0.390024  |
| 25 | C  | -4.076167 | -2.554278 | -0.356703 |
| 26 | C  | -2.889839 | -3.11538  | -0.815671 |
| 27 | H  | -2.82983  | -4.162151 | -1.10061  |
| 28 | C  | -1.762495 | -2.312013 | -0.898649 |
| 29 | H  | -0.78627  | -2.680875 | -1.2217   |
| 30 | N  | -1.658214 | 1.468997  | 0.520486  |
| 31 | C  | -2.87855  | 0.975884  | 0.247744  |
| 32 | C  | -4.021773 | 1.774725  | 0.29754   |
| 33 | H  | -4.996638 | 1.369399  | 0.037632  |
| 34 | C  | -3.892698 | 3.1104    | 0.655935  |
| 35 | C  | -2.630191 | 3.613791  | 0.950174  |
| 36 | H  | -2.486169 | 4.651955  | 1.237724  |
| 37 | C  | -1.542736 | 2.752947  | 0.860569  |
| 38 | H  | -0.530094 | 3.101135  | 1.069432  |
| 39 | C  | -0.178934 | 0.772367  | -2.249761 |
| 40 | O  | -0.315158 | 1.258981  | -3.309291 |
| 41 | H  | 1.983331  | -1.668075 | 4.897527  |
| 42 | H  | 5.805487  | 1.665583  | 0.129203  |
| 43 | H  | -4.977541 | -3.155744 | -0.264813 |
| 44 | H  | -4.769706 | 3.752415  | 0.695983  |
| 45 | C  | 1.883043  | -1.934722 | -2.2024   |
| 46 | O  | 3.089734  | -1.812618 | -2.447572 |
| 47 | O  | 1.31936   | -2.120012 | -1.081819 |

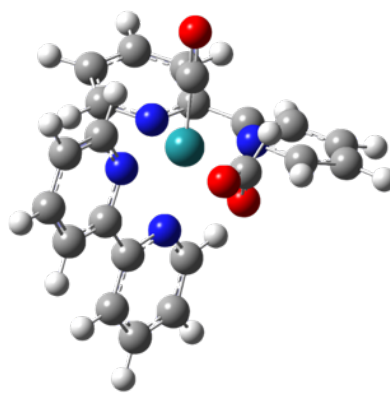

## References

- (1) Pavlishchuk, V.; Addison, A. W., Conversion Constants for Redox Potentials Measured Versus Different Reference Electrodes in Acetonitrile Solutions at 25°C. *Inorg. Chim. Acta.* 2000, 298, 97-102.
- (2) Fujita, E.; Creutz, C.; Sutin, N.; Szalda, D. J., Carbon dioxide activation by cobalt(I) macrocycles: factors affecting carbon dioxide and carbon monoxide binding. *J. Am. Chem. Soc.* 1991, 113, 343-353.
- (3) Furenlid, L. R.; Renner, M. W.; Szalda, D. J.; Fujita, E., EXAFS Studies of Nickel(II), Nickel(I), and Ni(I)-CO Tetraazamacrocycles and the Crystal Structure of (5,7,7,12,14,14-Hexamethyl-1,4,8,11-Tetraazacyclotetradeca-4,11-diene)nickel(I) Perchlorate. *J. Am. Chem. Soc.* 1991, 113, 883-892.
- (4) Hayashi, Y.; Kita, S.; Brunschwig, B. S.; Fujita, E., Involvement of a Binuclear Species with the Re–C(O)O–Re Moiety in CO<sub>2</sub> Reduction Catalyzed by Tricarbonyl Rhenium(I) Complexes with Diimine Ligands: Strikingly Slow Formation of the Re–Re and Re–C(O)O–Re Species from Re(dmb)(CO)<sub>3</sub>S (dmb = 4,4′-Dimethyl-2,2′-bipyridine, S = Solvent). *J. Am. Chem. Soc.* 2003, 125, 11976-11987.
- (5) Matsubara, Y.; Fujita, E.; Doherty, M. D.; Muckerman, J. T.; Creutz, C., Thermodynamic and Kinetic Hydricity of Ruthenium(II) Hydride Complexes. *J. Am. Chem. Soc.* 2012, 134, 15743-15757.
- (6) Fujita, E.; Creutz, C.; Sutin, N.; Brunschwig, B. S., Carbon Dioxide Activation by Cobalt Macrocycles: Evidence of Hydrogen Bonding Between Bound CO<sub>2</sub> and the Macrocycle in Solution. *Inorg. Chem.* 1993, 32, 2657-2662.
- (7) Matsubara, Y.; Hightower, S. E.; Chen, J.; Grills, D. C.; Polyansky, D. E.; Muckerman, J. T.; Tanaka, K.; Fujita, E., Reactivity of a fac-ReCl(α-diimine)(CO)<sub>3</sub> Complex With an NAD<sup>+</sup> Model Ligand Toward CO<sub>2</sub> Reduction. *Chem. Commun.* 2014, 50, 728-730.
- (8) Wiedner, E. S.; Chambers, M. B.; Pitman, C. L.; Bullock, R. M.; Miller, A. J. M.; Appel, A. M., Thermodynamic Hydricity of Transition Metal Hydrides. *Chem. Rev.* 2016, 116, 8655-8692.
- (9) Hu, Y.; Norton, J. R., Kinetics and Thermodynamics of H<sup>–</sup>/H<sup>•</sup>/H<sup>+</sup> Transfer from a Rhodium(III) Hydride. *J. Am. Chem. Soc.* 2014, 136, 5938-5948.
- (10) Izutsu, K.; Nakamura, T.; Takizawa, K.; Takeda, A., Calorimetric Determination of Thermodynamic Parameters for the Dissociations of Acids in Dipolar Aprotic Solvents. *Bull. Chem. Soc., Jpn.* 1985, 58, 455-458.
- (11) Kaljurand, I.; Kütt, A.; Sooväli, L.; Rodima, T.; Mäemets, V.; Leito, I.; Koppel, I. A., Extension of the Self-Consistent Spectrophotometric Basicity Scale in Acetonitrile to a Full Span of 28 pKa Units: Unification of Different Basicity Scales. *J. Org. Chem.* 2005, 70, 1019-1028.
- (12) Garg, K.; Matsubara, Y.; Ertem, M. Z.; Lewandowska-Andralojc, A.; Sato, S.; Szalda, D. J.; Muckerman, J. T.; Fujita, E., Striking Differences in Properties of Geometric Isomers of [Ir(tpy)(ppy)H]<sup>+</sup>: Experimental and Computational Studies of their Hydricities, Interaction with CO<sub>2</sub>, and Photochemistry. *Angew. Chem. Int. Ed.* 2015, 54, 14128-14132.
- (13) Waldie, K. M.; Ostericher, A. L.; Reineke, M. H.; Sasayama, A. F.; Kubiak, C. P., Hydricity of Transition-Metal Hydrides: Thermodynamic Considerations for CO<sub>2</sub> Reduction. *ACS Catal.* 2018, 8, 1313-1324.
- (14) Wayner, D. D. M.; Parker, V. D., Bond Energies in Solution from Electrode Potentials and Thermochemical Cycles. A Simplified and General Approach. *Acc. Chem. Res.* 1993, 26, 287-294.

- (15) Elkind, J. L.; Armentrout, P. B., Transition-Metal Hydride Bond Energies: First and Second Row. *Inorg. Chem.* 1986, 25, 1078-1080.
- (16) Wang, D.; Angelici, R. J., Metal–Hydrogen Bond Dissociation Enthalpies in Series of Complexes of Eight Different Transition Metals. *J. Am. Chem. Soc.* 1996, 118, 935-942.
- (17) Tilset, M., The Thermodynamics of Organometallic Systems Involving Electron-Transfer Paths. In *Electron Transfer in Chemistry*, Balzani, V., Ed. Wiley-VCH: Weinheim, Germany, 2008; Vol. II, pp 677-713.
- (18) Zhu, X.-Q.; Zhang, M.-T.; Yu, A.; Wang, C.-H.; Cheng, J.-P., Hydride, Hydrogen Atom, Proton, and Electron Transfer Driving Forces of Various Five-Membered Heterocyclic Organic Hydrides and Their Reaction Intermediates in Acetonitrile. *J. Am. Chem. Soc.* 2008, 130, 2501-2516.
- (19) Ilic, S.; Pandey Kadel, U.; Basdogan, Y.; Keith, J. A.; Glusac, K. D., Thermodynamic Hydricities of Biomimetic Organic Hydride Donors. *J. Am. Chem. Soc.* 2018, 140, 4569-4579.
